# Supplementary material
Source: publisher figshare collection journal article supplement (https://gsapubs.figshare.com/ndownloader/files/24459620)
Supplement: Supplementary file 1 [file 24459620]

## Sheet: Summary
Table DR6. DEPTH AND TIME SCALES FOR CORES
Table DR6a. Portland Core
Location:	Florence, Colorado, USA
Time scale:	Meyers et al. (2001)
Description:	A relative height depth scale (column C – “Height m”) was introduced during initial description and measurement of the Portland Core (Sageman et al., 1997). The height depth scale was anchored at 149.06m (489.04 ft) in the Portland Core to facilitate correlation and comparison of the Cenomanian-Turonian boundary interval to the nearby Base Turonian GSSP locality at Rock Canyon Anticline in Pueblo…
Table DR6b. Smoky Hollow #1 (SH#1) Core
Location:	near Big Water, Utah, USA in the Grand Staircase-Escalante National Monument
Time scale:	updated from Jones et al. (2019)
Description:	The timescale for the SH#1 Core, spanning the depth interval from 121.51m to 97.01m, derives from a short-eccentricity (97ka/cycle) traced ATS (Jones et al., 2019). A constant sedimentation rate of 3.9cm/kyr is extrapolated from the top of the ATS to the shallowest geochemical measurements at 94m. Since the OAE2 δ13C excursion occurs 131±22cm higher than the Osi excursion in the SH#1 Core, preser…
Table DR6c. Angus Core
Location:	Weld Co., Colorado, USA
Time scale:	Ma et al. (2014)
Description:	Ma et al. (2014) published an astrochronology for the Greenhorn Formation (Cenomanian-Turonian) in the Angus Core of the Denver Basin based on spectral analyses of XRF core scanning data. For this study, we constructed a time scale by tracing the precession cycles from bandpass filters of the Angus Core (see Figs. 7-8 of Ma et al. 2014). An average duration for the mid-Cretaceous precession cycle…

## Sheet: PortlandCore
Table DR6a. PORTLAND CORE DEPTH AND TIME SCALE
linearly interpolated timescale (dz=1cm)
Core depth (m)	Core depth (ft)	Height (m)	Adjusted height (m)	Interpolated floating time (kyr)	Anchored time (Meyers et al 2012 CTB = 93.90 Ma)	Anchored time (Jones et al 2020, CTB = 93.95 Ma)	notes
163.06	534.974	-14	-14	-759	95.2	95.25
163.05	534.941	-13.99	-13.99	-758.5	95.1995	95.2495
163.04	534.908	-13.98	-13.98	-758	95.199	95.249
163.03	534.875	-13.97	-13.97	-757.5	95.1985	95.2485
163.02	534.843	-13.96	-13.96	-757	95.198	95.248
163.01	534.81	-13.95	-13.95	-756.5	95.1975	95.2475	adjusted height = strat heigh w/ bentonite thickness removed.
163	534.777	-13.94	-13.94	-756	95.197	95.247	assuming linear sed rate of 2 cm/kyr from duration of M. mosbyense ammonite biozone
162.99	534.744	-13.93	-13.93	-755.5	95.1965	95.2465
162.98	534.711	-13.92	-13.92	-755	95.196	95.246
162.97	534.678	-13.91	-13.91	-754.5	95.1955	95.2455
162.96	534.646	-13.9	-13.9	-754	95.195	95.245
162.95	534.613	-13.89	-13.89	-753.5	95.1945	95.2445
162.94	534.58	-13.88	-13.88	-753	95.194	95.244
162.93	534.547	-13.87	-13.87	-752.5	95.1935	95.2435
162.92	534.514	-13.86	-13.86	-752	95.193	95.243
162.91	534.482	-13.85	-13.85	-751.5	95.1925	95.2425
162.9	534.449	-13.84	-13.84	-751	95.192	95.242
162.89	534.416	-13.83	-13.83	-750.5	95.1915	95.2415
162.88	534.383	-13.82	-13.82	-750	95.191	95.241
162.87	534.35	-13.81	-13.81	-749.5	95.1905	95.2405
162.86	534.318	-13.8	-13.8	-749	95.19	95.24
162.85	534.285	-13.79	-13.79	-748.5	95.1895	95.2395
162.84	534.252	-13.78	-13.78	-748	95.189	95.239
162.83	534.219	-13.77	-13.77	-747.5	95.1885	95.2385
162.82	534.186	-13.76	-13.76	-747	95.188	95.238
162.81	534.154	-13.75	-13.75	-746.5	95.1875	95.2375
162.8	534.121	-13.74	-13.74	-746	95.187	95.237
162.79	534.088	-13.73	-13.73	-745.5	95.1865	95.2365
162.78	534.055	-13.72	-13.72	-745	95.186	95.236
162.77	534.022	-13.71	-13.71	-744.5	95.1855	95.2355
162.76	533.99	-13.7	-13.7	-744	95.185	95.235
162.75	533.957	-13.69	-13.69	-743.5	95.1845	95.2345
162.74	533.924	-13.68	-13.68	-743	95.184	95.234
162.73	533.891	-13.67	-13.67	-742.5	95.1835	95.2335
162.72	533.858	-13.66	-13.66	-742	95.183	95.233
162.71	533.825	-13.65	-13.65	-741.5	95.1825	95.2325
162.7	533.793	-13.64	-13.64	-741	95.182	95.232
162.69	533.76	-13.63	-13.63	-740.5	95.1815	95.2315
162.68	533.727	-13.62	-13.62	-740	95.181	95.231
162.67	533.694	-13.61	-13.61	-739.5	95.1805	95.2305
162.66	533.661	-13.6	-13.6	-739	95.18	95.23
162.65	533.629	-13.59	-13.59	-738.5	95.1795	95.2295
162.64	533.596	-13.58	-13.58	-738	95.179	95.229
162.63	533.563	-13.57	-13.57	-737.5	95.1785	95.2285
162.62	533.53	-13.56	-13.56	-737	95.178	95.228
162.61	533.497	-13.55	-13.55	-736.5	95.1775	95.2275
162.6	533.465	-13.54	-13.54	-736	95.177	95.227
162.59	533.432	-13.53	-13.53	-735.5	95.1765	95.2265
162.58	533.399	-13.52	-13.52	-735	95.176	95.226
162.57	533.366	-13.51	-13.51	-734.5	95.1755	95.2255
162.56	533.333	-13.5	-13.5	-734	95.175	95.225
162.55	533.301	-13.49	-13.49	-733.5	95.1745	95.2245
162.54	533.268	-13.48	-13.48	-733	95.174	95.224
162.53	533.235	-13.47	-13.47	-732.5	95.1735	95.2235
162.52	533.202	-13.46	-13.46	-732	95.173	95.223
162.51	533.169	-13.45	-13.45	-731.5	95.1725	95.2225
162.5	533.136	-13.44	-13.44	-731	95.172	95.222
162.49	533.104	-13.43	-13.43	-730.5	95.1715	95.2215
162.48	533.071	-13.42	-13.42	-730	95.171	95.221
162.47	533.038	-13.41	-13.41	-729.5	95.1705	95.2205
162.46	533.005	-13.4	-13.4	-729	95.17	95.22
162.45	532.972	-13.39	-13.39	-728.5	95.1695	95.2195
162.44	532.94	-13.38	-13.38	-728	95.169	95.219
162.43	532.907	-13.37	-13.37	-727.5	95.1685	95.2185
162.42	532.874	-13.36	-13.36	-727	95.168	95.218
162.41	532.841	-13.35	-13.35	-726.5	95.1675	95.2175
162.4	532.808	-13.34	-13.34	-726	95.167	95.217
162.39	532.776	-13.33	-13.33	-725.5	95.1665	95.2165
162.38	532.743	-13.32	-13.32	-725	95.166	95.216
162.37	532.71	-13.31	-13.31	-724.5	95.1655	95.2155
162.36	532.677	-13.3	-13.3	-724	95.165	95.215
162.35	532.644	-13.29	-13.29	-723.5	95.1645	95.2145
162.34	532.612	-13.28	-13.28	-723	95.164	95.214
162.33	532.579	-13.27	-13.27	-722.5	95.1635	95.2135
162.32	532.546	-13.26	-13.26	-722	95.163	95.213
162.31	532.513	-13.25	-13.25	-721.5	95.1625	95.2125
162.3	532.48	-13.24	-13.24	-721	95.162	95.212
162.29	532.448	-13.23	-13.23	-720.5	95.1615	95.2115
162.28	532.415	-13.22	-13.22	-720	95.161	95.211
162.27	532.382	-13.21	-13.21	-719.5	95.1605	95.2105
162.26	532.349	-13.2	-13.2	-719	95.16	95.21
162.25	532.316	-13.19	-13.19	-718.5	95.1595	95.2095
162.24	532.283	-13.18	-13.18	-718	95.159	95.209
162.23	532.251	-13.17	-13.17	-717.5	95.1585	95.2085
162.22	532.218	-13.16	-13.16	-717	95.158	95.208
162.21	532.185	-13.15	-13.15	-716.5	95.1575	95.2075
162.2	532.152	-13.14	-13.14	-716	95.157	95.207
162.19	532.119	-13.13	-13.13	-715.5	95.1565	95.2065
162.18	532.087	-13.12	-13.12	-715	95.156	95.206
162.17	532.054	-13.11	-13.11	-714.5	95.1555	95.2055
162.16	532.021	-13.1	-13.1	-714	95.155	95.205
162.15	531.988	-13.09	-13.09	-713.5	95.1545	95.2045
162.14	531.955	-13.08	-13.08	-713	95.154	95.204
162.13	531.923	-13.07	-13.07	-712.5	95.1535	95.2035
162.12	531.89	-13.06	-13.06	-712	95.153	95.203
162.11	531.857	-13.05	-13.05	-711.5	95.1525	95.2025
162.1	531.824	-13.04	-13.04	-711	95.152	95.202
162.09	531.791	-13.03	-13.03	-710.5	95.1515	95.2015
162.08	531.759	-13.02	-13.02	-710	95.151	95.201
162.07	531.726	-13.01	-13.01	-709.5	95.1505	95.2005
162.06	531.693	-13	-13	-709	95.15	95.2
162.05	531.66	-12.99	-12.99	-708.5	95.1495	95.1995
162.04	531.627	-12.98	-12.98	-708	95.149	95.199
162.03	531.594	-12.97	-12.97	-707.5	95.1485	95.1985
162.02	531.562	-12.96	-12.96	-707	95.148	95.198
162.01	531.529	-12.95	-12.95	-706.5	95.1475	95.1975
162	531.496	-12.94	-12.94	-706	95.147	95.197
161.99	531.463	-12.93	-12.93	-705.5	95.1465	95.1965
161.98	531.43	-12.92	-12.92	-705	95.146	95.196
161.97	531.398	-12.91	-12.91	-704.5	95.1455	95.1955
161.96	531.365	-12.9	-12.9	-704	95.145	95.195
161.95	531.332	-12.89	-12.89	-703.5	95.1445	95.1945
161.94	531.299	-12.88	-12.88	-703	95.144	95.194
161.93	531.266	-12.87	-12.87	-702.5	95.1435	95.1935
161.92	531.234	-12.86	-12.86	-702	95.143	95.193
161.91	531.201	-12.85	-12.85	-701.5	95.1425	95.1925
161.9	531.168	-12.84	-12.84	-701	95.142	95.192
161.89	531.135	-12.83	-12.83	-700.5	95.1415	95.1915
161.88	531.102	-12.82	-12.82	-700	95.141	95.191
161.87	531.07	-12.81	-12.81	-699.5	95.1405	95.1905
161.86	531.037	-12.8	-12.8	-699	95.14	95.19
161.85	531.004	-12.79	-12.79	-698.5	95.1395	95.1895
161.84	530.971	-12.78	-12.78	-698	95.139	95.189
161.83	530.938	-12.77	-12.77	-697.5	95.1385	95.1885
161.82	530.906	-12.76	-12.76	-697	95.138	95.188
161.81	530.873	-12.75	-12.75	-696.5	95.1375	95.1875
161.8	530.84	-12.74	-12.74	-696	95.137	95.187
161.79	530.807	-12.73	-12.73	-695.5	95.1365	95.1865
161.78	530.774	-12.72	-12.72	-695	95.136	95.186
161.77	530.741	-12.71	-12.71	-694.5	95.1355	95.1855
161.76	530.709	-12.7	-12.7	-694	95.135	95.185
161.75	530.676	-12.69	-12.69	-693.5	95.1345	95.1845
161.74	530.643	-12.68	-12.68	-693	95.134	95.184
161.73	530.61	-12.67	-12.67	-692.5	95.1335	95.1835
161.72	530.577	-12.66	-12.66	-692	95.133	95.183
161.71	530.545	-12.65	-12.65	-691.5	95.1325	95.1825
161.7	530.512	-12.64	-12.64	-691	95.132	95.182
161.69	530.479	-12.63	-12.63	-690.5	95.1315	95.1815
161.68	530.446	-12.62	-12.62	-690	95.131	95.181
161.67	530.413	-12.61	-12.61	-689.5	95.1305	95.1805
161.66	530.381	-12.6	-12.6	-689	95.13	95.18
161.65	530.348	-12.59	-12.59	-688.5	95.1295	95.1795
161.64	530.315	-12.58	-12.58	-688	95.129	95.179
161.63	530.282	-12.57	-12.57	-687.5	95.1285	95.1785
161.62	530.249	-12.56	-12.56	-687	95.128	95.178
161.61	530.217	-12.55	-12.55	-686.5	95.1275	95.1775
161.6	530.184	-12.54	-12.54	-686	95.127	95.177
161.59	530.151	-12.53	-12.53	-685.5	95.1265	95.1765
161.58	530.118	-12.52	-12.52	-685	95.126	95.176
161.57	530.085	-12.51	-12.51	-684.5	95.1255	95.1755
161.56	530.052	-12.5	-12.5	-684	95.125	95.175
161.55	530.02	-12.49	-12.49	-683.5	95.1245	95.1745
161.54	529.987	-12.48	-12.48	-683	95.124	95.174
161.53	529.954	-12.47	-12.47	-682.5	95.1235	95.1735
161.52	529.921	-12.46	-12.46	-682	95.123	95.173
161.51	529.888	-12.45	-12.45	-681.5	95.1225	95.1725
161.5	529.856	-12.44	-12.44	-681	95.122	95.172
161.49	529.823	-12.43	-12.43	-680.5	95.1215	95.1715
161.48	529.79	-12.42	-12.42	-680	95.121	95.171
161.47	529.757	-12.41	-12.41	-679.5	95.1205	95.1705
161.46	529.724	-12.4	-12.4	-679	95.12	95.17
161.45	529.692	-12.39	-12.39	-678.5	95.1195	95.1695
161.44	529.659	-12.38	-12.38	-678	95.119	95.169
161.43	529.626	-12.37	-12.37	-677.5	95.1185	95.1685
161.42	529.593	-12.36	-12.36	-677	95.118	95.168
161.41	529.56	-12.35	-12.35	-676.5	95.1175	95.1675
161.4	529.528	-12.34	-12.34	-676	95.117	95.167
161.39	529.495	-12.33	-12.33	-675.5	95.1165	95.1665
161.38	529.462	-12.32	-12.32	-675	95.116	95.166
161.37	529.429	-12.31	-12.31	-674.5	95.1155	95.1655
161.36	529.396	-12.3	-12.3	-674	95.115	95.165
161.35	529.364	-12.29	-12.29	-673.5	95.1145	95.1645
161.34	529.331	-12.28	-12.28	-673	95.114	95.164
161.33	529.298	-12.27	-12.27	-672.5	95.1135	95.1635
161.32	529.265	-12.26	-12.26	-672	95.113	95.163
161.31	529.232	-12.25	-12.25	-671.5	95.1125	95.1625
161.3	529.199	-12.24	-12.24	-671	95.112	95.162
161.29	529.167	-12.23	-12.23	-670.5	95.1115	95.1615
161.28	529.134	-12.22	-12.22	-670	95.111	95.161
161.27	529.101	-12.21	-12.21	-669.5	95.1105	95.1605
161.26	529.068	-12.2	-12.2	-669	95.11	95.16
161.25	529.035	-12.19	-12.19	-668.5	95.1095	95.1595
161.24	529.003	-12.18	-12.18	-668	95.109	95.159
161.23	528.97	-12.17	-12.17	-667.5	95.1085	95.1585
161.22	528.937	-12.16	-12.16	-667	95.108	95.158
161.21	528.904	-12.15	-12.15	-666.5	95.1075	95.1575
161.2	528.871	-12.14	-12.14	-666	95.107	95.157
161.19	528.839	-12.13	-12.13	-665.5	95.1065	95.1565
161.18	528.806	-12.12	-12.12	-665	95.106	95.156
161.17	528.773	-12.11	-12.11	-664.5	95.1055	95.1555
161.16	528.74	-12.1	-12.1	-664	95.105	95.155
161.15	528.707	-12.09	-12.09	-663.5	95.1045	95.1545
161.14	528.675	-12.08	-12.08	-663	95.104	95.154
161.13	528.642	-12.07	-12.07	-662.5	95.1035	95.1535
161.12	528.609	-12.06	-12.06	-662	95.103	95.153
161.11	528.576	-12.05	-12.05	-661.5	95.1025	95.1525
161.1	528.543	-12.04	-12.04	-661	95.102	95.152
161.09	528.51	-12.03	-12.03	-660.5	95.1015	95.1515
161.08	528.478	-12.02	-12.02	-660	95.101	95.151
161.07	528.445	-12.01	-12.01	-659.5	95.1005	95.1505
161.06	528.412	-12	-12	-659	95.1	95.15
161.05	528.379	-11.99	-11.99	-658.5	95.0995	95.1495
161.04	528.346	-11.98	-11.98	-658	95.099	95.149
161.03	528.314	-11.97	-11.97	-657.5	95.0985	95.1485
161.02	528.281	-11.96	-11.96	-657	95.098	95.148
161.01	528.248	-11.95	-11.95	-656.5	95.0975	95.1475
161	528.215	-11.94	-11.94	-656	95.097	95.147
160.99	528.182	-11.93	-11.93	-655.5	95.0965	95.1465
160.98	528.15	-11.92	-11.92	-655	95.096	95.146
160.97	528.117	-11.91	-11.91	-654.5	95.0955	95.1455
160.96	528.084	-11.9	-11.9	-654	95.095	95.145
160.95	528.051	-11.89	-11.89	-653.5	95.0945	95.1445
160.94	528.018	-11.88	-11.88	-653	95.094	95.144
160.93	527.986	-11.87	-11.87	-652.5	95.0935	95.1435
160.92	527.953	-11.86	-11.86	-652	95.093	95.143
160.91	527.92	-11.85	-11.85	-651.5	95.0925	95.1425
160.9	527.887	-11.84	-11.84	-651	95.092	95.142
160.89	527.854	-11.83	-11.83	-650.5	95.0915	95.1415
160.88	527.822	-11.82	-11.82	-650	95.091	95.141
160.87	527.789	-11.81	-11.81	-649.5	95.0905	95.1405
160.86	527.756	-11.8	-11.8	-649	95.09	95.14
160.85	527.723	-11.79	-11.79	-648.5	95.0895	95.1395
160.84	527.69	-11.78	-11.78	-648	95.089	95.139
160.83	527.657	-11.77	-11.77	-647.5	95.0885	95.1385
160.82	527.625	-11.76	-11.76	-647	95.088	95.138
160.81	527.592	-11.75	-11.75	-646.5	95.0875	95.1375
160.8	527.559	-11.74	-11.74	-646	95.087	95.137
160.79	527.526	-11.73	-11.73	-645.5	95.0865	95.1365
160.78	527.493	-11.72	-11.72	-645	95.086	95.136
160.77	527.461	-11.71	-11.71	-644.5	95.0855	95.1355
160.76	527.428	-11.7	-11.7	-644	95.085	95.135
160.75	527.395	-11.69	-11.69	-643.5	95.0845	95.1345
160.74	527.362	-11.68	-11.68	-643	95.084	95.134
160.73	527.329	-11.67	-11.67	-642.5	95.0835	95.1335
160.72	527.297	-11.66	-11.66	-642	95.083	95.133
160.71	527.264	-11.65	-11.65	-641.5	95.0825	95.1325
160.7	527.231	-11.64	-11.64	-641	95.082	95.132
160.69	527.198	-11.63	-11.63	-640.5	95.0815	95.1315
160.68	527.165	-11.62	-11.62	-640	95.081	95.131
160.67	527.133	-11.61	-11.61	-639.5	95.0805	95.1305
160.66	527.1	-11.6	-11.6	-639	95.08	95.13
160.65	527.067	-11.59	-11.59	-638.5	95.0795	95.1295
160.64	527.034	-11.58	-11.58	-638	95.079	95.129
160.63	527.001	-11.57	-11.57	-637.5	95.0785	95.1285
160.62	526.969	-11.56	-11.56	-637	95.078	95.128
160.61	526.936	-11.55	-11.55	-636.5	95.0775	95.1275
160.6	526.903	-11.54	-11.54	-636	95.077	95.127
160.59	526.87	-11.53	-11.53	-635.5	95.0765	95.1265
160.58	526.837	-11.52	-11.52	-635	95.076	95.126
160.57	526.804	-11.51	-11.51	-634.5	95.0755	95.1255
160.56	526.772	-11.5	-11.5	-634	95.075	95.125
160.55	526.739	-11.49	-11.49	-633.5	95.0745	95.1245
160.54	526.706	-11.48	-11.48	-633	95.074	95.124
160.53	526.673	-11.47	-11.47	-632.5	95.0735	95.1235
160.52	526.64	-11.46	-11.46	-632	95.073	95.123
160.51	526.608	-11.45	-11.45	-631.5	95.0725	95.1225
160.5	526.575	-11.44	-11.44	-631	95.072	95.122
160.49	526.542	-11.43	-11.43	-630.5	95.0715	95.1215
160.48	526.509	-11.42	-11.42	-630	95.071	95.121
160.47	526.476	-11.41	-11.41	-629.5	95.0705	95.1205
160.46	526.444	-11.4	-11.4	-629	95.07	95.12
160.45	526.411	-11.39	-11.39	-628.5	95.0695	95.1195
160.44	526.378	-11.38	-11.38	-628	95.069	95.119
160.43	526.345	-11.37	-11.37	-627.5	95.0685	95.1185
160.42	526.312	-11.36	-11.36	-627	95.068	95.118
160.41	526.28	-11.35	-11.35	-626.5	95.0675	95.1175
160.4	526.247	-11.34	-11.34	-626	95.067	95.117
160.39	526.214	-11.33	-11.33	-625.5	95.0665	95.1165
160.38	526.181	-11.32	-11.32	-625	95.066	95.116
160.37	526.148	-11.31	-11.31	-624.5	95.0655	95.1155
160.36	526.115	-11.3	-11.3	-624	95.065	95.115
160.35	526.083	-11.29	-11.29	-623.5	95.0645	95.1145
160.34	526.05	-11.28	-11.28	-623	95.064	95.114
160.33	526.017	-11.27	-11.27	-622.5	95.0635	95.1135
160.32	525.984	-11.26	-11.26	-622	95.063	95.113
160.31	525.951	-11.25	-11.25	-621.5	95.0625	95.1125
160.3	525.919	-11.24	-11.24	-621	95.062	95.112
160.29	525.886	-11.23	-11.23	-620.5	95.0615	95.1115
160.28	525.853	-11.22	-11.22	-620	95.061	95.111
160.27	525.82	-11.21	-11.21	-619.5	95.0605	95.1105
160.26	525.787	-11.2	-11.2	-619	95.06	95.11
160.25	525.755	-11.19	-11.19	-618.5	95.0595	95.1095
160.24	525.722	-11.18	-11.18	-618	95.059	95.109
160.23	525.689	-11.17	-11.17	-617.5	95.0585	95.1085
160.22	525.656	-11.16	-11.16	-617	95.058	95.108
160.21	525.623	-11.15	-11.15	-616.5	95.0575	95.1075
160.2	525.591	-11.14	-11.14	-616	95.057	95.107
160.19	525.558	-11.13	-11.13	-615.5	95.0565	95.1065
160.18	525.525	-11.12	-11.12	-615	95.056	95.106
160.17	525.492	-11.11	-11.11	-614.5	95.0555	95.1055
160.16	525.459	-11.1	-11.1	-614	95.055	95.105
160.15	525.427	-11.09	-11.09	-613.5	95.0545	95.1045
160.14	525.394	-11.08	-11.08	-613	95.054	95.104
160.13	525.361	-11.07	-11.07	-612.5	95.0535	95.1035
160.12	525.328	-11.06	-11.06	-612	95.053	95.103
160.11	525.295	-11.05	-11.05	-611.5	95.0525	95.1025
160.1	525.262	-11.04	-11.04	-611	95.052	95.102
160.09	525.23	-11.03	-11.03	-610.5	95.0515	95.1015
160.08	525.197	-11.02	-11.02	-610	95.051	95.101
160.07	525.164	-11.01	-11.01	-609.5	95.0505	95.1005
160.06	525.131	-11	-11	-609	95.05	95.1
160.05	525.098	-10.99	-10.99	-608.5	95.0495	95.0995
160.04	525.066	-10.98	-10.98	-608	95.049	95.099
160.03	525.033	-10.97	-10.97	-607.5	95.0485	95.0985
160.02	525	-10.96	-10.96	-607	95.048	95.098
160.01	524.967	-10.95	-10.95	-606.5	95.0475	95.0975
160	524.934	-10.94	-10.94	-606	95.047	95.097
159.99	524.902	-10.93	-10.93	-605.5	95.0465	95.0965
159.98	524.869	-10.92	-10.92	-605	95.046	95.096
159.97	524.836	-10.91	-10.91	-604.5	95.0455	95.0955
159.96	524.803	-10.9	-10.9	-604	95.045	95.095
159.95	524.77	-10.89	-10.89	-603.5	95.0445	95.0945
159.94	524.738	-10.88	-10.88	-603	95.044	95.094
159.93	524.705	-10.87	-10.87	-602.5	95.0435	95.0935
159.92	524.672	-10.86	-10.86	-602	95.043	95.093
159.91	524.639	-10.85	-10.85	-601.5	95.0425	95.0925
159.9	524.606	-10.84	-10.84	-601	95.042	95.092
159.89	524.573	-10.83	-10.83	-600.5	95.0415	95.0915
159.88	524.541	-10.82	-10.82	-600	95.041	95.091
159.87	524.508	-10.81	-10.81	-599.5	95.0405	95.0905
159.86	524.475	-10.8	-10.8	-599	95.04	95.09
159.85	524.442	-10.79	-10.79	-598.5	95.0395	95.0895
159.84	524.409	-10.78	-10.78	-598	95.039	95.089
159.83	524.377	-10.77	-10.77	-597.5	95.0385	95.0885
159.82	524.344	-10.76	-10.76	-597	95.038	95.088
159.81	524.311	-10.75	-10.75	-596.5	95.0375	95.0875
159.8	524.278	-10.74	-10.74	-596	95.037	95.087
159.79	524.245	-10.73	-10.73	-595.5	95.0365	95.0865
159.78	524.213	-10.72	-10.72	-595	95.036	95.086
159.77	524.18	-10.71	-10.71	-594.5	95.0355	95.0855
159.76	524.147	-10.7	-10.7	-594	95.035	95.085
159.75	524.114	-10.69	-10.69	-593.5	95.0345	95.0845
159.74	524.081	-10.68	-10.68	-593	95.034	95.084
159.73	524.049	-10.67	-10.67	-592.5	95.0335	95.0835
159.72	524.016	-10.66	-10.66	-592	95.033	95.083
159.71	523.983	-10.65	-10.65	-591.5	95.0325	95.0825
159.7	523.95	-10.64	-10.64	-591	95.032	95.082
159.69	523.917	-10.63	-10.63	-590.5	95.0315	95.0815
159.68	523.885	-10.62	-10.62	-590	95.031	95.081
159.67	523.852	-10.61	-10.61	-589.5	95.0305	95.0805
159.66	523.819	-10.6	-10.6	-589	95.03	95.08
159.65	523.786	-10.59	-10.59	-588.5	95.0295	95.0795
159.64	523.753	-10.58	-10.58	-588	95.029	95.079
159.63	523.72	-10.57	-10.57	-587.5	95.0285	95.0785
159.62	523.688	-10.56	-10.56	-587	95.028	95.078
159.61	523.655	-10.55	-10.55	-586.5	95.0275	95.0775
159.6	523.622	-10.54	-10.54	-586	95.027	95.077
159.59	523.589	-10.53	-10.53	-585.5	95.0265	95.0765
159.58	523.556	-10.52	-10.52	-585	95.026	95.076
159.57	523.524	-10.51	-10.51	-584.5	95.0255	95.0755
159.56	523.491	-10.5	-10.5	-584	95.025	95.075
159.55	523.458	-10.49	-10.49	-583.5	95.0245	95.0745
159.54	523.425	-10.48	-10.48	-583	95.024	95.074
159.53	523.392	-10.47	-10.47	-582.5	95.0235	95.0735
159.52	523.36	-10.46	-10.46	-582	95.023	95.073
159.51	523.327	-10.45	-10.45	-581.5	95.0225	95.0725
159.5	523.294	-10.44	-10.44	-581	95.022	95.072
159.49	523.261	-10.43	-10.43	-580.5	95.0215	95.0715
159.48	523.228	-10.42	-10.42	-580	95.021	95.071
159.47	523.196	-10.41	-10.41	-579.5	95.0205	95.0705
159.46	523.163	-10.4	-10.4	-579	95.02	95.07
159.45	523.13	-10.39	-10.39	-578.5	95.0195	95.0695
159.44	523.097	-10.38	-10.38	-578	95.019	95.069
159.43	523.064	-10.37	-10.37	-577.5	95.0185	95.0685
159.42	523.031	-10.36	-10.36	-577	95.018	95.068
159.41	522.999	-10.35	-10.35	-576.5	95.0175	95.0675
159.4	522.966	-10.34	-10.34	-576	95.017	95.067
159.39	522.933	-10.33	-10.33	-575.5	95.0165	95.0665
159.38	522.9	-10.32	-10.32	-575	95.016	95.066
159.37	522.867	-10.31	-10.31	-574.5	95.0155	95.0655
159.36	522.835	-10.3	-10.3	-574	95.015	95.065
159.35	522.802	-10.29	-10.29	-573.5	95.0145	95.0645
159.34	522.769	-10.28	-10.28	-573	95.014	95.064
159.33	522.736	-10.27	-10.27	-572.5	95.0135	95.0635
159.32	522.703	-10.26	-10.26	-572	95.013	95.063
159.31	522.671	-10.25	-10.25	-571.5	95.0125	95.0625
159.3	522.638	-10.24	-10.24	-571	95.012	95.062
159.29	522.605	-10.23	-10.23	-570.5	95.0115	95.0615
159.28	522.572	-10.22	-10.22	-570	95.011	95.061
159.27	522.539	-10.21	-10.21	-569.5	95.0105	95.0605
159.26	522.507	-10.2	-10.2	-569	95.01	95.06
159.25	522.474	-10.19	-10.19	-568.5	95.0095	95.0595
159.24	522.441	-10.18	-10.18	-568	95.009	95.059
159.23	522.408	-10.17	-10.17	-567.5	95.0085	95.0585
159.22	522.375	-10.16	-10.16	-567	95.008	95.058
159.21	522.343	-10.15	-10.15	-566.5	95.0075	95.0575
159.2	522.31	-10.14	-10.14	-566	95.007	95.057
159.19	522.277	-10.13	-10.13	-565.5	95.0065	95.0565
159.18	522.244	-10.12	-10.12	-565	95.006	95.056
159.17	522.211	-10.11	-10.11	-564.5	95.0055	95.0555
159.16	522.178	-10.1	-10.1	-564	95.005	95.055
159.15	522.146	-10.09	-10.09	-563.5	95.0045	95.0545
159.14	522.113	-10.08	-10.08	-563	95.004	95.054
159.13	522.08	-10.07	-10.07	-562.5	95.0035	95.0535
159.12	522.047	-10.06	-10.06	-562	95.003	95.053
159.11	522.014	-10.05	-10.05	-561.5	95.0025	95.0525
159.1	521.982	-10.04	-10.04	-561	95.002	95.052
159.09	521.949	-10.03	-10.03	-560.5	95.0015	95.0515
159.08	521.916	-10.02	-10.02	-560	95.001	95.051
159.07	521.883	-10.01	-10.01	-559.5	95.0005	95.0505
159.06	521.85	-10	-10	-559	95	95.05
159.05	521.818	-9.99	-9.99	-558.5	94.9995	95.0495
159.04	521.785	-9.98	-9.98	-558	94.999	95.049
159.03	521.752	-9.97	-9.97	-557.5	94.9985	95.0485
159.02	521.719	-9.96	-9.96	-557	94.998	95.048
159.01	521.686	-9.95	-9.95	-556.5	94.9975	95.0475
159	521.654	-9.94	-9.94	-556	94.997	95.047
158.99	521.621	-9.93	-9.93	-555.5	94.9965	95.0465
158.98	521.588	-9.92	-9.92	-555	94.996	95.046
158.97	521.555	-9.91	-9.91	-554.5	94.9955	95.0455
158.96	521.522	-9.9	-9.9	-554	94.995	95.045
158.95	521.49	-9.89	-9.89	-553.5	94.9945	95.0445
158.94	521.457	-9.88	-9.88	-553	94.994	95.044
158.93	521.424	-9.87	-9.87	-552.5	94.9935	95.0435
158.92	521.391	-9.86	-9.86	-552	94.993	95.043
158.91	521.358	-9.85	-9.85	-551.5	94.9925	95.0425
158.9	521.325	-9.84	-9.84	-551	94.992	95.042
158.89	521.293	-9.83	-9.83	-550.5	94.9915	95.0415
158.88	521.26	-9.82	-9.82	-550	94.991	95.041
158.87	521.227	-9.81	-9.81	-549.5	94.9905	95.0405
158.86	521.194	-9.8	-9.8	-549	94.99	95.04
158.85	521.161	-9.79	-9.79	-548.5	94.9895	95.0395
158.84	521.129	-9.78	-9.78	-548	94.989	95.039
158.83	521.096	-9.77	-9.77	-547.5	94.9885	95.0385
158.82	521.063	-9.76	-9.76	-547	94.988	95.038
158.81	521.03	-9.75	-9.75	-546.5	94.9875	95.0375
158.8	520.997	-9.74	-9.74	-546	94.987	95.037
158.79	520.965	-9.73	-9.73	-545.5	94.9865	95.0365
158.78	520.932	-9.72	-9.72	-545	94.986	95.036
158.77	520.899	-9.71	-9.71	-544.5	94.9855	95.0355
158.76	520.866	-9.7	-9.7	-544	94.985	95.035
158.75	520.833	-9.69	-9.69	-543.5	94.9845	95.0345
158.74	520.801	-9.68	-9.68	-543	94.984	95.034
158.73	520.768	-9.67	-9.67	-542.5	94.9835	95.0335
158.72	520.735	-9.66	-9.66	-542	94.983	95.033
158.71	520.702	-9.65	-9.65	-541.5	94.9825	95.0325
158.7	520.669	-9.64	-9.64	-541	94.982	95.032
158.69	520.636	-9.63	-9.63	-540.5	94.9815	95.0315
158.68	520.604	-9.62	-9.62	-540	94.981	95.031
158.67	520.571	-9.61	-9.61	-539.5	94.9805	95.0305
158.66	520.538	-9.6	-9.6	-539	94.98	95.03
158.65	520.505	-9.59	-9.59	-538.5	94.9795	95.0295
158.64	520.472	-9.58	-9.58	-538	94.979	95.029
158.63	520.44	-9.57	-9.57	-537.5	94.9785	95.0285
158.62	520.407	-9.56	-9.56	-537	94.978	95.028
158.61	520.374	-9.55	-9.55	-536.5	94.9775	95.0275
158.6	520.341	-9.54	-9.54	-536	94.977	95.027
158.59	520.308	-9.53	-9.53	-535.5	94.9765	95.0265
158.58	520.276	-9.52	-9.52	-535	94.976	95.026
158.57	520.243	-9.51	-9.51	-534.5	94.9755	95.0255
158.56	520.21	-9.5	-9.5	-534	94.975	95.025
158.55	520.177	-9.49	-9.49	-533.5	94.9745	95.0245
158.54	520.144	-9.48	-9.48	-533	94.974	95.024
158.53	520.112	-9.47	-9.47	-532.5	94.9735	95.0235
158.52	520.079	-9.46	-9.46	-532	94.973	95.023
158.51	520.046	-9.45	-9.45	-531.5	94.9725	95.0225
158.5	520.013	-9.44	-9.44	-531	94.972	95.022
158.49	519.98	-9.43	-9.43	-530.5	94.9715	95.0215
158.48	519.948	-9.42	-9.42	-530	94.971	95.021
158.47	519.915	-9.41	-9.41	-529.5	94.9705	95.0205
158.46	519.882	-9.4	-9.4	-529	94.97	95.02
158.45	519.849	-9.39	-9.39	-528.5	94.9695	95.0195
158.44	519.816	-9.38	-9.38	-528	94.969	95.019
158.43	519.783	-9.37	-9.37	-527.5	94.9685	95.0185
158.42	519.751	-9.36	-9.36	-527	94.968	95.018
158.41	519.718	-9.35	-9.35	-526.5	94.9675	95.0175
158.4	519.685	-9.34	-9.34	-526	94.967	95.017
158.39	519.652	-9.33	-9.33	-525.5	94.9665	95.0165
158.38	519.619	-9.32	-9.32	-525	94.966	95.016
158.37	519.587	-9.31	-9.31	-524.5	94.9655	95.0155
158.36	519.554	-9.3	-9.3	-524	94.965	95.015
158.35	519.521	-9.29	-9.29	-523.5	94.9645	95.0145
158.34	519.488	-9.28	-9.28	-523	94.964	95.014
158.33	519.455	-9.27	-9.27	-522.5	94.9635	95.0135
158.32	519.423	-9.26	-9.26	-522	94.963	95.013
158.31	519.39	-9.25	-9.25	-521.5	94.9625	95.0125
158.3	519.357	-9.24	-9.24	-521	94.962	95.012
158.29	519.324	-9.23	-9.23	-520.5	94.9615	95.0115
158.28	519.291	-9.22	-9.22	-520	94.961	95.011
158.27	519.259	-9.21	-9.21	-519.5	94.9605	95.0105
158.26	519.226	-9.2	-9.2	-519	94.96	95.01
158.25	519.193	-9.19	-9.19	-518.5	94.9595	95.0095
158.24	519.16	-9.18	-9.18	-518	94.959	95.009
158.23	519.127	-9.17	-9.17	-517.5	94.9585	95.0085
158.22	519.094	-9.16	-9.16	-517	94.958	95.008
158.21	519.062	-9.15	-9.15	-516.5	94.9575	95.0075
158.2	519.029	-9.14	-9.14	-516	94.957	95.007
158.19	518.996	-9.13	-9.13	-515.5	94.9565	95.0065
158.18	518.963	-9.12	-9.12	-515	94.956	95.006
158.17	518.93	-9.11	-9.11	-514.5	94.9555	95.0055
158.16	518.898	-9.1	-9.1	-514	94.955	95.005
158.15	518.865	-9.09	-9.09	-513.5	94.9545	95.0045
158.14	518.832	-9.08	-9.08	-513	94.954	95.004
158.13	518.799	-9.07	-9.07	-512.5	94.9535	95.0035
158.12	518.766	-9.06	-9.06	-512	94.953	95.003
158.11	518.734	-9.05	-9.05	-511.5	94.9525	95.0025
158.1	518.701	-9.04	-9.04	-511	94.952	95.002
158.09	518.668	-9.03	-9.03	-510.5	94.9515	95.0015
158.08	518.635	-9.02	-9.02	-510	94.951	95.001
158.07	518.602	-9.01	-9.01	-509.5	94.9505	95.0005
158.06	518.57	-9	-9	-509	94.95	95
158.05	518.537	-8.99	-8.99	-508.5	94.9495	94.9995
158.04	518.504	-8.98	-8.98	-508	94.949	94.999
158.03	518.471	-8.97	-8.97	-507.5	94.9485	94.9985
158.02	518.438	-8.96	-8.96	-507	94.948	94.998
158.01	518.406	-8.95	-8.95	-506.5	94.9475	94.9975
158	518.373	-8.94	-8.94	-506	94.947	94.997
157.99	518.34	-8.93	-8.93	-505.5	94.9465	94.9965
157.98	518.307	-8.92	-8.92	-505	94.946	94.996
157.97	518.274	-8.91	-8.91	-504.5	94.9455	94.9955
157.96	518.241	-8.9	-8.9	-504	94.945	94.995
157.95	518.209	-8.89	-8.89	-503.5	94.9445	94.9945
157.94	518.176	-8.88	-8.88	-503	94.944	94.994
157.93	518.143	-8.87	-8.87	-502.5	94.9435	94.9935
157.92	518.11	-8.86	-8.86	-502	94.943	94.993
157.91	518.077	-8.85	-8.85	-501.5	94.9425	94.9925
157.9	518.045	-8.84	-8.84	-501	94.942	94.992
157.89	518.012	-8.83	-8.83	-500.5	94.9415	94.9915
157.88	517.979	-8.82	-8.82	-500	94.941	94.991
157.87	517.946	-8.81	-8.81	-499.5	94.9405	94.9905
157.86	517.913	-8.8	-8.8	-499	94.94	94.99
157.85	517.881	-8.79	-8.79	-498.5	94.9395	94.9895
157.84	517.848	-8.78	-8.78	-498	94.939	94.989
157.83	517.815	-8.77	-8.77	-497.5	94.9385	94.9885
157.82	517.782	-8.76	-8.76	-497	94.938	94.988
157.81	517.749	-8.75	-8.75	-496.5	94.9375	94.9875
157.8	517.717	-8.74	-8.74	-496	94.937	94.987
157.79	517.684	-8.73	-8.73	-495.5	94.9365	94.9865
157.78	517.651	-8.72	-8.72	-495	94.936	94.986
157.77	517.618	-8.71	-8.71	-494.5	94.9355	94.9855
157.76	517.585	-8.7	-8.7	-494	94.935	94.985
157.75	517.552	-8.69	-8.69	-493.5	94.9345	94.9845
157.74	517.52	-8.68	-8.68	-493	94.934	94.984
157.73	517.487	-8.67	-8.67	-492.5	94.9335	94.9835
157.72	517.454	-8.66	-8.66	-492	94.933	94.983
157.71	517.421	-8.65	-8.65	-491.5	94.9325	94.9825
157.7	517.388	-8.64	-8.64	-491	94.932	94.982
157.69	517.356	-8.63	-8.63	-490.5	94.9315	94.9815
157.68	517.323	-8.62	-8.62	-490	94.931	94.981
157.67	517.29	-8.61	-8.61	-489.5	94.9305	94.9805
157.66	517.257	-8.6	-8.6	-489	94.93	94.98
157.65	517.224	-8.59	-8.59	-488.5	94.9295	94.9795
157.64	517.192	-8.58	-8.58	-488	94.929	94.979
157.63	517.159	-8.57	-8.57	-487.5	94.9285	94.9785
157.62	517.126	-8.56	-8.56	-487	94.928	94.978
157.61	517.093	-8.55	-8.55	-486.5	94.9275	94.9775
157.6	517.06	-8.54	-8.54	-486	94.927	94.977
157.59	517.028	-8.53	-8.53	-485.5	94.9265	94.9765
157.58	516.995	-8.52	-8.52	-485	94.926	94.976
157.57	516.962	-8.51	-8.51	-484.5	94.9255	94.9755
157.56	516.929	-8.5	-8.5	-484	94.925	94.975
157.55	516.896	-8.49	-8.49	-483.5	94.9245	94.9745
157.54	516.864	-8.48	-8.48	-483	94.924	94.974
157.53	516.831	-8.47	-8.47	-482.5	94.9235	94.9735
157.52	516.798	-8.46	-8.46	-482	94.923	94.973
157.51	516.765	-8.45	-8.45	-481.5	94.9225	94.9725
157.5	516.732	-8.44	-8.44	-481	94.922	94.972
157.49	516.699	-8.43	-8.43	-480.5	94.9215	94.9715
157.48	516.667	-8.42	-8.42	-480	94.921	94.971
157.47	516.634	-8.41	-8.41	-479.5	94.9205	94.9705
157.46	516.601	-8.4	-8.4	-479	94.92	94.97
157.45	516.568	-8.39	-8.39	-478.5	94.9195	94.9695
157.44	516.535	-8.38	-8.38	-478	94.919	94.969
157.43	516.503	-8.37	-8.37	-477.5	94.9185	94.9685
157.42	516.47	-8.36	-8.36	-477	94.918	94.968
157.41	516.437	-8.35	-8.35	-476.5	94.9175	94.9675
157.4	516.404	-8.34	-8.34	-476	94.917	94.967
157.39	516.371	-8.33	-8.33	-475.5	94.9165	94.9665
157.38	516.339	-8.32	-8.32	-475	94.916	94.966
157.37	516.306	-8.31	-8.31	-474.5	94.9155	94.9655
157.36	516.273	-8.3	-8.3	-474	94.915	94.965
157.35	516.24	-8.29	-8.29	-473.5	94.9145	94.9645
157.34	516.207	-8.28	-8.28	-473	94.914	94.964
157.33	516.175	-8.27	-8.27	-472.5	94.9135	94.9635
157.32	516.142	-8.26	-8.26	-472	94.913	94.963
157.31	516.109	-8.25	-8.25	-471.5	94.9125	94.9625
157.3	516.076	-8.24	-8.24	-471	94.912	94.962
157.29	516.043	-8.23	-8.23	-470.5	94.9115	94.9615
157.28	516.01	-8.22	-8.22	-470	94.911	94.961
157.27	515.978	-8.21	-8.21	-469.5	94.9105	94.9605
157.26	515.945	-8.2	-8.2	-469	94.91	94.96
157.25	515.912	-8.19	-8.19	-468.5	94.9095	94.9595
157.24	515.879	-8.18	-8.18	-468	94.909	94.959
157.23	515.846	-8.17	-8.17	-467.5	94.9085	94.9585
157.22	515.814	-8.16	-8.16	-467	94.908	94.958
157.21	515.781	-8.15	-8.15	-466.5	94.9075	94.9575
157.2	515.748	-8.14	-8.14	-466	94.907	94.957
157.19	515.715	-8.13	-8.13	-465.5	94.9065	94.9565
157.18	515.682	-8.12	-8.12	-465	94.906	94.956
157.17	515.65	-8.11	-8.11	-464.5	94.9055	94.9555
157.16	515.617	-8.1	-8.1	-464	94.905	94.955
157.15	515.584	-8.09	-8.09	-463.5	94.9045	94.9545
157.14	515.551	-8.08	-8.08	-463	94.904	94.954
157.13	515.518	-8.07	-8.07	-462.5	94.9035	94.9535
157.12	515.486	-8.06	-8.06	-462	94.903	94.953
157.11	515.453	-8.05	-8.05	-461.5	94.9025	94.9525
157.1	515.42	-8.04	-8.04	-461	94.902	94.952
157.09	515.387	-8.03	-8.03	-460.5	94.9015	94.9515
157.08	515.354	-8.02	-8.02	-460	94.901	94.951
157.07	515.322	-8.01	-8.01	-459.5	94.9005	94.9505
157.06	515.289	-8	-8	-459	94.9	94.95
157.05	515.256	-7.99	-7.99	-458.5	94.8995	94.9495
157.04	515.223	-7.98	-7.98	-458	94.899	94.949
157.03	515.19	-7.97	-7.97	-457.5	94.8985	94.9485
157.02	515.157	-7.96	-7.96	-457	94.898	94.948
157.01	515.125	-7.95	-7.95	-456.5	94.8975	94.9475
157	515.092	-7.94	-7.94	-456	94.897	94.947
156.99	515.059	-7.93	-7.93	-455.5	94.8965	94.9465
156.98	515.026	-7.92	-7.92	-455	94.896	94.946
156.97	514.993	-7.91	-7.91	-454.5	94.8955	94.9455
156.96	514.961	-7.9	-7.9	-454	94.895	94.945
156.95	514.928	-7.89	-7.89	-453.5	94.8945	94.9445
156.94	514.895	-7.88	-7.88	-453	94.894	94.944
156.93	514.862	-7.87	-7.87	-452.5	94.8935	94.9435
156.92	514.829	-7.86	-7.86	-452	94.893	94.943
156.91	514.797	-7.85	-7.85	-451.5	94.8925	94.9425
156.9	514.764	-7.84	-7.84	-451	94.892	94.942
156.89	514.731	-7.83	-7.83	-450.5	94.8915	94.9415
156.88	514.698	-7.82	-7.82	-450	94.891	94.941
156.87	514.665	-7.81	-7.81	-449.5	94.8905	94.9405
156.86	514.633	-7.8	-7.8	-449	94.89	94.94
156.85	514.6	-7.79	-7.79	-448.5	94.8895	94.9395
156.84	514.567	-7.78	-7.78	-448	94.889	94.939
156.83	514.534	-7.77	-7.77	-447.5	94.8885	94.9385
156.82	514.501	-7.76	-7.76	-447	94.888	94.938
156.81	514.469	-7.75	-7.75	-446.5	94.8875	94.9375
156.8	514.436	-7.74	-7.74	-446	94.887	94.937
156.79	514.403	-7.73	-7.73	-445.5	94.8865	94.9365
156.78	514.37	-7.72	-7.72	-445	94.886	94.936
156.77	514.337	-7.71	-7.71	-444.5	94.8855	94.9355
156.76	514.304	-7.7	-7.7	-444	94.885	94.935
156.75	514.272	-7.69	-7.69	-443.5	94.8845	94.9345
156.74	514.239	-7.68	-7.68	-443	94.884	94.934
156.73	514.206	-7.67	-7.67	-442.5	94.8835	94.9335
156.72	514.173	-7.66	-7.66	-442	94.883	94.933
156.71	514.14	-7.65	-7.65	-441.5	94.8825	94.9325
156.7	514.108	-7.64	-7.64	-441	94.882	94.932
156.69	514.075	-7.63	-7.63	-440.5	94.8815	94.9315
156.68	514.042	-7.62	-7.62	-440	94.881	94.931
156.67	514.009	-7.61	-7.61	-439.5	94.8805	94.9305
156.66	513.976	-7.6	-7.6	-439	94.88	94.93
156.65	513.944	-7.59	-7.59	-438.5	94.8795	94.9295
156.64	513.911	-7.58	-7.58	-438	94.879	94.929
156.63	513.878	-7.57	-7.57	-437.5	94.8785	94.9285
156.62	513.845	-7.56	-7.56	-437	94.878	94.928
156.61	513.812	-7.55	-7.55	-436.5	94.8775	94.9275
156.6	513.78	-7.54	-7.54	-436	94.877	94.927
156.59	513.747	-7.53	-7.53	-435.5	94.8765	94.9265
156.58	513.714	-7.52	-7.52	-435	94.876	94.926
156.57	513.681	-7.51	-7.51	-434.5	94.8755	94.9255
156.56	513.648	-7.5	-7.5	-434	94.875	94.925
156.55	513.615	-7.49	-7.49	-433.5	94.8745	94.9245
156.54	513.583	-7.48	-7.48	-433	94.874	94.924
156.53	513.55	-7.47	-7.47	-432.5	94.8735	94.9235
156.52	513.517	-7.46	-7.46	-432	94.873	94.923
156.51	513.484	-7.45	-7.45	-431.5	94.8725	94.9225
156.5	513.451	-7.44	-7.44	-431	94.872	94.922
156.49	513.419	-7.43	-7.43	-430.5	94.8715	94.9215
156.48	513.386	-7.42	-7.42	-430	94.871	94.921
156.47	513.353	-7.41	-7.41	-429.5	94.8705	94.9205
156.46	513.32	-7.4	-7.4	-429	94.87	94.92
156.45	513.287	-7.39	-7.39	-428.5	94.8695	94.9195
156.44	513.255	-7.38	-7.38	-428	94.869	94.919
156.43	513.222	-7.37	-7.37	-427.5	94.8685	94.9185
156.42	513.189	-7.36	-7.36	-427	94.868	94.918
156.41	513.156	-7.35	-7.35	-426.5	94.8675	94.9175
156.4	513.123	-7.34	-7.34	-426	94.867	94.917
156.39	513.091	-7.33	-7.33	-425.5	94.8665	94.9165
156.38	513.058	-7.32	-7.32	-425	94.866	94.916
156.37	513.025	-7.31	-7.31	-424.5	94.8655	94.9155
156.36	512.992	-7.3	-7.3	-424	94.865	94.915
156.35	512.959	-7.29	-7.29	-423.5	94.8645	94.9145
156.34	512.927	-7.28	-7.28	-423	94.864	94.914
156.33	512.894	-7.27	-7.27	-422.5	94.8635	94.9135
156.32	512.861	-7.26	-7.26	-422	94.863	94.913
156.31	512.828	-7.25	-7.25	-421.5	94.8625	94.9125
156.3	512.795	-7.24	-7.24	-421	94.862	94.912
156.29	512.762	-7.23	-7.23	-420.5	94.8615	94.9115
156.28	512.73	-7.22	-7.22	-420	94.861	94.911
156.27	512.697	-7.21	-7.21	-419.5	94.8605	94.9105
156.26	512.664	-7.2	-7.2	-419	94.86	94.91
156.25	512.631	-7.19	-7.19	-418.5	94.8595	94.9095
156.24	512.598	-7.18	-7.18	-418	94.859	94.909
156.23	512.566	-7.17	-7.17	-417.5	94.8585	94.9085
156.22	512.533	-7.16	-7.16	-417	94.858	94.908
156.21	512.5	-7.15	-7.15	-416.5	94.8575	94.9075
156.2	512.467	-7.14	-7.14	-416	94.857	94.907
156.19	512.434	-7.13	-7.13	-415.5	94.8565	94.9065
156.18	512.402	-7.12	-7.12	-415	94.856	94.906
156.17	512.369	-7.11	-7.11	-414.5	94.8555	94.9055
156.16	512.336	-7.1	-7.1	-414	94.855	94.905
156.15	512.303	-7.09	-7.09	-413.5	94.8545	94.9045
156.14	512.27	-7.08	-7.08	-413	94.854	94.904
156.13	512.238	-7.07	-7.07	-412.5	94.8535	94.9035
156.12	512.205	-7.06	-7.06	-412	94.853	94.903
156.11	512.172	-7.05	-7.05	-411.5	94.8525	94.9025
156.1	512.139	-7.04	-7.04	-411	94.852	94.902
156.09	512.106	-7.03	-7.03	-410.5	94.8515	94.9015
156.08	512.073	-7.02	-7.02	-410	94.851	94.901
156.07	512.041	-7.01	-7.01	-409.5	94.8505	94.9005
156.06	512.008	-7	-7	-409	94.85	94.9
156.05	511.975	-6.99	-6.99	-408.5	94.8495	94.8995
156.04	511.942	-6.98	-6.98	-408	94.849	94.899
156.03	511.909	-6.97	-6.97	-407.5	94.8485	94.8985
156.02	511.877	-6.96	-6.96	-407	94.848	94.898
156.01	511.844	-6.95	-6.95	-406.5	94.8475	94.8975
156	511.811	-6.94	-6.94	-406	94.847	94.897
155.99	511.778	-6.93	-6.93	-405.5	94.8465	94.8965
155.98	511.745	-6.92	-6.92	-405	94.846	94.896
155.97	511.713	-6.91	-6.91	-404.5	94.8455	94.8955
155.96	511.68	-6.9	-6.9	-404	94.845	94.895
155.95	511.647	-6.89	-6.89	-403.5	94.8445	94.8945
155.94	511.614	-6.88	-6.88	-403	94.844	94.894
155.93	511.581	-6.87	-6.87	-402.5	94.8435	94.8935
155.92	511.549	-6.86	-6.86	-402	94.843	94.893
155.91	511.516	-6.85	-6.85	-401.5	94.8425	94.8925
155.9	511.483	-6.84	-6.84	-401	94.842	94.892
155.89	511.45	-6.83	-6.83	-400.5	94.8415	94.8915
155.88	511.417	-6.82	-6.82	-400	94.841	94.891
155.87	511.385	-6.81	-6.81	-399.5	94.8405	94.8905
155.86	511.352	-6.8	-6.8	-399	94.84	94.89
155.85	511.319	-6.79	-6.79	-398.5	94.8395	94.8895
155.84	511.286	-6.78	-6.78	-398	94.839	94.889
155.83	511.253	-6.77	-6.77	-397.5	94.8385	94.8885
155.82	511.22	-6.76	-6.76	-397	94.838	94.888
155.81	511.188	-6.75	-6.75	-396.5	94.8375	94.8875
155.8	511.155	-6.74	-6.74	-396	94.837	94.887
155.79	511.122	-6.73	-6.73	-395.5	94.8365	94.8865
155.78	511.089	-6.72	-6.72	-395	94.836	94.886
155.77	511.056	-6.71	-6.71	-394.5	94.8355	94.8855
155.76	511.024	-6.7	-6.7	-394	94.835	94.885
155.75	510.991	-6.69	-6.69	-393.5	94.8345	94.8845
155.74	510.958	-6.68	-6.68	-393	94.834	94.884
155.73	510.925	-6.67	-6.67	-392.5	94.8335	94.8835
155.72	510.892	-6.66	-6.66	-392	94.833	94.883
155.71	510.86	-6.65	-6.65	-391.5	94.8325	94.8825
155.7	510.827	-6.64	-6.64	-391	94.832	94.882
155.69	510.794	-6.63	-6.63	-390.5	94.8315	94.8815
155.68	510.761	-6.62	-6.62	-390	94.831	94.881
155.67	510.728	-6.61	-6.61	-389.5	94.8305	94.8805
155.66	510.696	-6.6	-6.6	-389	94.83	94.88
155.65	510.663	-6.59	-6.59	-388.5	94.8295	94.8795
155.64	510.63	-6.58	-6.58	-388	94.829	94.879
155.63	510.597	-6.57	-6.57	-387.5	94.8285	94.8785
155.62	510.564	-6.56	-6.56	-387	94.828	94.878
155.61	510.531	-6.55	-6.55	-386.5	94.8275	94.8775
155.6	510.499	-6.54	-6.54	-386	94.827	94.877
155.59	510.466	-6.53	-6.53	-385.5	94.8265	94.8765
155.58	510.433	-6.52	-6.52	-385	94.826	94.876
155.57	510.4	-6.51	-6.51	-384.5	94.8255	94.8755
155.56	510.367	-6.5	-6.5	-384	94.825	94.875
155.55	510.335	-6.49	-6.49	-383.5	94.8245	94.8745
155.54	510.302	-6.48	-6.48	-383	94.824	94.874
155.53	510.269	-6.47	-6.47	-382.5	94.8235	94.8735
155.52	510.236	-6.46	-6.46	-382	94.823	94.873
155.51	510.203	-6.45	-6.45	-381.5	94.8225	94.8725
155.5	510.171	-6.44	-6.44	-381	94.822	94.872
155.49	510.138	-6.43	-6.43	-380.5	94.8215	94.8715
155.48	510.105	-6.42	-6.42	-380	94.821	94.871
155.47	510.072	-6.41	-6.41	-379.5	94.8205	94.8705
155.46	510.039	-6.4	-6.4	-379	94.82	94.87
155.45	510.007	-6.39	-6.39	-378.5	94.8195	94.8695
155.44	509.974	-6.38	-6.38	-378	94.819	94.869
155.43	509.941	-6.37	-6.37	-377.5	94.8185	94.8685
155.42	509.908	-6.36	-6.36	-377	94.818	94.868
155.41	509.875	-6.35	-6.35	-376.5	94.8175	94.8675
155.4	509.843	-6.34	-6.34	-376	94.817	94.867
155.39	509.81	-6.33	-6.33	-375.5	94.8165	94.8665
155.38	509.777	-6.32	-6.32	-375	94.816	94.866
155.37	509.744	-6.31	-6.31	-374.5	94.8155	94.8655
155.36	509.711	-6.3	-6.3	-374	94.815	94.865
155.35	509.678	-6.29	-6.29	-373.5	94.8145	94.8645
155.34	509.646	-6.28	-6.28	-373	94.814	94.864
155.33	509.613	-6.27	-6.27	-372.5	94.8135	94.8635
155.32	509.58	-6.26	-6.26	-372	94.813	94.863
155.31	509.547	-6.25	-6.25	-371.5	94.8125	94.8625
155.3	509.514	-6.24	-6.24	-371	94.812	94.862
155.29	509.482	-6.23	-6.23	-370.5	94.8115	94.8615
155.28	509.449	-6.22	-6.22	-370	94.811	94.861
155.27	509.416	-6.21	-6.21	-369.5	94.8105	94.8605
155.26	509.383	-6.2	-6.2	-369	94.81	94.86
155.25	509.35	-6.19	-6.19	-368.5	94.8095	94.8595
155.24	509.318	-6.18	-6.18	-368	94.809	94.859
155.23	509.285	-6.17	-6.17	-367.5	94.8085	94.8585
155.22	509.252	-6.16	-6.16	-367	94.808	94.858
155.21	509.219	-6.15	-6.15	-366.5	94.8075	94.8575
155.2	509.186	-6.14	-6.14	-366	94.807	94.857
155.19	509.154	-6.13	-6.13	-365.5	94.8065	94.8565
155.18	509.121	-6.12	-6.12	-365	94.806	94.856
155.17	509.088	-6.11	-6.11	-364.5	94.8055	94.8555
155.16	509.055	-6.1	-6.1	-364	94.805	94.855
155.15	509.022	-6.09	-6.09	-363.5	94.8045	94.8545
155.14	508.99	-6.08	-6.08	-363	94.804	94.854
155.13	508.957	-6.07	-6.07	-362.5	94.8035	94.8535
155.12	508.924	-6.06	-6.06	-362	94.803	94.853
155.11	508.891	-6.05	-6.05	-361.5	94.8025	94.8525
155.1	508.858	-6.04	-6.04	-361	94.802	94.852
155.09	508.825	-6.03	-6.03	-360.5	94.8015	94.8515
155.08	508.793	-6.02	-6.02	-360	94.801	94.851
155.07	508.76	-6.01	-6.01	-359.5	94.8005	94.8505
155.06	508.727	-6	-6	-359	94.8	94.85
155.05	508.694	-5.99	-5.99	-358.5	94.7995	94.8495
155.04	508.661	-5.98	-5.98	-358	94.799	94.849
155.03	508.629	-5.97	-5.97	-357.5	94.7985	94.8485
155.02	508.596	-5.96	-5.96	-357	94.798	94.848
155.01	508.563	-5.95	-5.95	-356.5	94.7975	94.8475
155	508.53	-5.94	-5.94	-356	94.797	94.847
154.99	508.497	-5.93	-5.93	-355.5	94.7965	94.8465
154.98	508.465	-5.92	-5.92	-355	94.796	94.846
154.97	508.432	-5.91	-5.91	-354.5	94.7955	94.8455
154.96	508.399	-5.9	-5.9	-354	94.795	94.845
154.95	508.366	-5.89	-5.89	-353.5	94.7945	94.8445
154.94	508.333	-5.88	-5.88	-353	94.794	94.844
154.93	508.301	-5.87	-5.87	-352.5	94.7935	94.8435
154.92	508.268	-5.86	-5.86	-352	94.793	94.843
154.91	508.235	-5.85	-5.85	-351.5	94.7925	94.8425
154.9	508.202	-5.84	-5.84	-351	94.792	94.842
154.89	508.169	-5.83	-5.83	-350.5	94.7915	94.8415
154.88	508.136	-5.82	-5.82	-350	94.791	94.841
154.87	508.104	-5.81	-5.81	-349.5	94.7905	94.8405
154.86	508.071	-5.8	-5.8	-349	94.79	94.84
154.85	508.038	-5.79	-5.79	-348.5	94.7895	94.8395
154.84	508.005	-5.78	-5.78	-348	94.789	94.839
154.83	507.972	-5.77	-5.77	-347.5	94.7885	94.8385
154.82	507.94	-5.76	-5.76	-347	94.788	94.838
154.81	507.907	-5.75	-5.75	-346.5	94.7875	94.8375
154.8	507.874	-5.74	-5.74	-346	94.787	94.837
154.79	507.841	-5.73	-5.73	-345.5	94.7865	94.8365
154.78	507.808	-5.72	-5.72	-345	94.786	94.836
154.77	507.776	-5.71	-5.71	-344.5	94.7855	94.8355
154.76	507.743	-5.7	-5.7	-344	94.785	94.835
154.75	507.71	-5.69	-5.69	-343.5	94.7845	94.8345
154.74	507.677	-5.68	-5.68	-343	94.784	94.834
154.73	507.644	-5.67	-5.67	-342.5	94.7835	94.8335
154.72	507.612	-5.66	-5.66	-342	94.783	94.833
154.71	507.579	-5.65	-5.65	-341.5	94.7825	94.8325
154.7	507.546	-5.64	-5.64	-341	94.782	94.832
154.69	507.513	-5.63	-5.63	-340.5	94.7815	94.8315
154.68	507.48	-5.62	-5.62	-340	94.781	94.831
154.67	507.448	-5.61	-5.61	-339.5	94.7805	94.8305
154.66	507.415	-5.6	-5.6	-339	94.78	94.83
154.65	507.382	-5.59	-5.59	-338.5	94.7795	94.8295
154.64	507.349	-5.58	-5.58	-338	94.779	94.829
154.63	507.316	-5.57	-5.57	-337.5	94.7785	94.8285
154.62	507.283	-5.56	-5.56	-337	94.778	94.828
154.61	507.251	-5.55	-5.55	-336.5	94.7775	94.8275
154.6	507.218	-5.54	-5.54	-336	94.777	94.827
154.59	507.185	-5.53	-5.53	-335.5	94.7765	94.8265
154.58	507.152	-5.52	-5.52	-335	94.776	94.826
154.57	507.119	-5.51	-5.51	-334.5	94.7755	94.8255
154.56	507.087	-5.5	-5.5	-334	94.775	94.825
154.55	507.054	-5.49	-5.49	-333.5	94.7745	94.8245
154.54	507.021	-5.48	-5.48	-333	94.774	94.824
154.53	506.988	-5.47	-5.47	-332.5	94.7735	94.8235
154.52	506.955	-5.46	-5.46	-332	94.773	94.823
154.51	506.923	-5.45	-5.45	-331.5	94.7725	94.8225
154.5	506.89	-5.44	-5.44	-331	94.772	94.822
154.49	506.857	-5.43	-5.43	-330.5	94.7715	94.8215
154.48	506.824	-5.42	-5.42	-330	94.771	94.821
154.47	506.791	-5.41	-5.41	-329.5	94.7705	94.8205
154.46	506.759	-5.4	-5.4	-329	94.77	94.82
154.45	506.726	-5.39	-5.39	-328.5	94.7695	94.8195
154.44	506.693	-5.38	-5.38	-328	94.769	94.819
154.43	506.66	-5.37	-5.37	-327.5	94.7685	94.8185
154.42	506.627	-5.36	-5.36	-327	94.768	94.818
154.41	506.594	-5.35	-5.35	-326.5	94.7675	94.8175
154.4	506.562	-5.34	-5.34	-326	94.767	94.817
154.39	506.529	-5.33	-5.33	-325.5	94.7665	94.8165
154.38	506.496	-5.32	-5.32	-325	94.766	94.816
154.37	506.463	-5.31	-5.31	-324.5	94.7655	94.8155
154.36	506.43	-5.3	-5.3	-324	94.765	94.815
154.35	506.398	-5.29	-5.29	-323.5	94.7645	94.8145
154.34	506.365	-5.28	-5.28	-323	94.764	94.814
154.33	506.332	-5.27	-5.27	-322.5	94.7635	94.8135
154.32	506.299	-5.26	-5.26	-322	94.763	94.813
154.31	506.266	-5.25	-5.25	-321.5	94.7625	94.8125
154.3	506.234	-5.24	-5.24	-321	94.762	94.812
154.29	506.201	-5.23	-5.23	-320.5	94.7615	94.8115
154.28	506.168	-5.22	-5.22	-320	94.761	94.811
154.27	506.135	-5.21	-5.21	-319.5	94.7605	94.8105
154.26	506.102	-5.2	-5.2	-319	94.76	94.81
154.25	506.07	-5.19	-5.19	-318.5	94.7595	94.8095
154.24	506.037	-5.18	-5.18	-318	94.759	94.809
154.23	506.004	-5.17	-5.17	-317.5	94.7585	94.8085
154.22	505.971	-5.16	-5.16	-317	94.758	94.808
154.21	505.938	-5.15	-5.15	-316.5	94.7575	94.8075
154.2	505.906	-5.14	-5.14	-316	94.757	94.807
154.19	505.873	-5.13	-5.13	-315.5	94.7565	94.8065
154.18	505.84	-5.12	-5.12	-315	94.756	94.806
154.17	505.807	-5.11	-5.11	-314.5	94.7555	94.8055
154.16	505.774	-5.1	-5.1	-314	94.755	94.805
154.15	505.741	-5.09	-5.09	-313.5	94.7545	94.8045
154.14	505.709	-5.08	-5.08	-313	94.754	94.804
154.13	505.676	-5.07	-5.07	-312.5	94.7535	94.8035
154.12	505.643	-5.06	-5.06	-312	94.753	94.803
154.11	505.61	-5.05	-5.05	-311.5	94.7525	94.8025
154.1	505.577	-5.04	-5.04	-311	94.752	94.802
154.09	505.545	-5.03	-5.03	-310.5	94.7515	94.8015
154.08	505.512	-5.02	-5.02	-310	94.751	94.801
154.07	505.479	-5.01	-5.01	-309.5	94.7505	94.8005
154.06	505.446	-5	-5	-309	94.75	94.8
154.05	505.413	-4.99	-4.99	-308.5	94.7495	94.7995
154.04	505.381	-4.98	-4.98	-308	94.749	94.799
154.03	505.348	-4.97	-4.97	-307.5	94.7485	94.7985
154.02	505.315	-4.96	-4.96	-307	94.748	94.798
154.01	505.282	-4.95	-4.95	-306.5	94.7475	94.7975
154	505.249	-4.94	-4.94	-306	94.747	94.797
153.99	505.217	-4.93	-4.93	-305.5	94.7465	94.7965
153.98	505.184	-4.92	-4.92	-305	94.746	94.796
153.97	505.151	-4.91	-4.91	-304.5	94.7455	94.7955
153.96	505.118	-4.9	-4.9	-304	94.745	94.795
153.95	505.085	-4.89	-4.89	-303.5	94.7445	94.7945
153.94	505.052	-4.88	-4.88	-303	94.744	94.794
153.93	505.02	-4.87	-4.87	-302.5	94.7435	94.7935
153.92	504.987	-4.86	-4.86	-302	94.743	94.793
153.91	504.954	-4.85	-4.85	-301.5	94.7425	94.7925
153.9	504.921	-4.84	-4.84	-301	94.742	94.792
153.89	504.888	-4.83	-4.83	-300.5	94.7415	94.7915
153.88	504.856	-4.82	-4.82	-300	94.741	94.791
153.87	504.823	-4.81	-4.81	-299.5	94.7405	94.7905
153.86	504.79	-4.8	-4.8	-299	94.74	94.79
153.85	504.757	-4.79	-4.79	-298.5	94.7395	94.7895
153.84	504.724	-4.78	-4.78	-298	94.739	94.789
153.83	504.692	-4.77	-4.77	-297.5	94.7385	94.7885
153.82	504.659	-4.76	-4.76	-297	94.738	94.788
153.81	504.626	-4.75	-4.75	-296.5	94.7375	94.7875
153.8	504.593	-4.74	-4.74	-296	94.737	94.787
153.79	504.56	-4.73	-4.73	-295.5	94.7365	94.7865
153.78	504.528	-4.72	-4.72	-295	94.736	94.786
153.77	504.495	-4.71	-4.71	-294.5	94.7355	94.7855
153.76	504.462	-4.7	-4.7	-294	94.735	94.785
153.75	504.429	-4.69	-4.69	-293.5	94.7345	94.7845
153.74	504.396	-4.68	-4.68	-293	94.734	94.784
153.73	504.364	-4.67	-4.67	-292.5	94.7335	94.7835
153.72	504.331	-4.66	-4.66	-292	94.733	94.783
153.71	504.298	-4.65	-4.65	-291.5	94.7325	94.7825
153.7	504.265	-4.64	-4.64	-291	94.732	94.782
153.69	504.232	-4.63	-4.63	-290.5	94.7315	94.7815
153.68	504.199	-4.62	-4.62	-290	94.731	94.781
153.67	504.167	-4.61	-4.61	-289.5	94.7305	94.7805
153.66	504.134	-4.6	-4.6	-289	94.73	94.78
153.65	504.101	-4.59	-4.59	-288.5	94.7295	94.7795
153.64	504.068	-4.58	-4.58	-288	94.729	94.779
153.63	504.035	-4.57	-4.57	-287.5	94.7285	94.7785
153.62	504.003	-4.56	-4.56	-287	94.728	94.778
153.61	503.97	-4.55	-4.55	-286.5	94.7275	94.7775
153.6	503.937	-4.54	-4.54	-286	94.727	94.777
153.59	503.904	-4.53	-4.53	-285.5	94.7265	94.7765
153.58	503.871	-4.52	-4.52	-285	94.726	94.776
153.57	503.839	-4.51	-4.51	-284.5	94.7255	94.7755
153.56	503.806	-4.5	-4.5	-284	94.725	94.775
153.55	503.773	-4.49	-4.49	-283.5	94.7245	94.7745
153.54	503.74	-4.48	-4.48	-283	94.724	94.774
153.53	503.707	-4.47	-4.47	-282.5	94.7235	94.7735
153.52	503.675	-4.46	-4.46	-282	94.723	94.773
153.51	503.642	-4.45	-4.45	-281.5	94.7225	94.7725
153.5	503.609	-4.44	-4.44	-281	94.722	94.772
153.49	503.576	-4.43	-4.43	-280.5	94.7215	94.7715
153.48	503.543	-4.42	-4.42	-280	94.721	94.771
153.47	503.51	-4.41	-4.41	-279.5	94.7205	94.7705
153.46	503.478	-4.4	-4.4	-279	94.72	94.77
153.45	503.445	-4.39	-4.39	-278.5	94.7195	94.7695
153.44	503.412	-4.38	-4.38	-278	94.719	94.769
153.43	503.379	-4.37	-4.37	-277.5	94.7185	94.7685
153.42	503.346	-4.36	-4.36	-277	94.718	94.768
153.41	503.314	-4.35	-4.35	-276.5	94.7175	94.7675
153.4	503.281	-4.34	-4.34	-276	94.717	94.767
153.39	503.248	-4.33	-4.33	-275.5	94.7165	94.7665
153.38	503.215	-4.32	-4.32	-275	94.716	94.766
153.37	503.182	-4.31	-4.31	-274.5	94.7155	94.7655
153.36	503.15	-4.3	-4.3	-274	94.715	94.765
153.35	503.117	-4.29	-4.29	-273.5	94.7145	94.7645
153.34	503.084	-4.28	-4.28	-273	94.714	94.764
153.33	503.051	-4.27	-4.27	-272.5	94.7135	94.7635
153.32	503.018	-4.26	-4.26	-272	94.713	94.763
153.31	502.986	-4.25	-4.25	-271.5	94.7125	94.7625
153.3	502.953	-4.24	-4.24	-271	94.712	94.762
153.29	502.92	-4.23	-4.23	-270.5	94.7115	94.7615
153.28	502.887	-4.22	-4.22	-270	94.711	94.761
153.27	502.854	-4.21	-4.21	-269.5	94.7105	94.7605
153.26	502.822	-4.2	-4.2	-269	94.71	94.76
153.25	502.789	-4.19	-4.19	-268.5	94.7095	94.7595
153.24	502.756	-4.18	-4.18	-268	94.709	94.759
153.23	502.723	-4.17	-4.17	-267.5	94.7085	94.7585
153.22	502.69	-4.16	-4.16	-267	94.708	94.758
153.21	502.657	-4.15	-4.15	-266.5	94.7075	94.7575
153.2	502.625	-4.14	-4.14	-266	94.707	94.757
153.19	502.592	-4.13	-4.13	-265.5	94.7065	94.7565
153.18	502.559	-4.12	-4.12	-265	94.706	94.756
153.17	502.526	-4.11	-4.11	-264.5	94.7055	94.7555
153.16	502.493	-4.1	-4.1	-264	94.705	94.755
153.15	502.461	-4.09	-4.09	-263.5	94.7045	94.7545
153.14	502.428	-4.08	-4.08	-263	94.704	94.754
153.13	502.395	-4.07	-4.07	-262.5	94.7035	94.7535
153.12	502.362	-4.06	-4.06	-262	94.703	94.753
153.11	502.329	-4.05	-4.05	-261.5	94.7025	94.7525
153.1	502.297	-4.04	-4.04	-261	94.702	94.752
153.09	502.264	-4.03	-4.03	-260.5	94.7015	94.7515
153.08	502.231	-4.02	-4.02	-260	94.701	94.751
153.07	502.198	-4.01	-4.01	-259.5	94.7005	94.7505
153.06	502.165	-4	-4	-259	94.7	94.75
153.05	502.133	-3.99	-3.99	-258.5	94.6995	94.7495
153.04	502.1	-3.98	-3.98	-258	94.699	94.749
153.03	502.067	-3.97	-3.97	-257.5	94.6985	94.7485
153.02	502.034	-3.96	-3.96	-257	94.698	94.748
153.01	502.001	-3.95	-3.95	-256.5	94.6975	94.7475
153	501.969	-3.94	-3.94	-256	94.697	94.747
152.99	501.936	-3.93	-3.93	-255.5	94.6965	94.7465
152.98	501.903	-3.92	-3.92	-255	94.696	94.746
152.97	501.87	-3.91	-3.91	-254.5	94.6955	94.7455
152.96	501.837	-3.9	-3.9	-254	94.695	94.745
152.95	501.804	-3.89	-3.89	-253.5	94.6945	94.7445
152.94	501.772	-3.88	-3.88	-253	94.694	94.744
152.93	501.739	-3.87	-3.87	-252.5	94.6935	94.7435
152.92	501.706	-3.86	-3.86	-252	94.693	94.743
152.91	501.673	-3.85	-3.85	-251.5	94.6925	94.7425
152.9	501.64	-3.84	-3.84	-251	94.692	94.742
152.89	501.608	-3.83	-3.83	-250.5	94.6915	94.7415
152.88	501.575	-3.82	-3.82	-250	94.691	94.741
152.87	501.542	-3.81	-3.81	-249.5	94.6905	94.7405
152.86	501.509	-3.8	-3.8	-249	94.69	94.74
152.85	501.476	-3.79	-3.79	-248.5	94.6895	94.7395
152.84	501.444	-3.78	-3.78	-248	94.689	94.739
152.83	501.411	-3.77	-3.77	-247.5	94.6885	94.7385
152.82	501.378	-3.76	-3.76	-247	94.688	94.738
152.81	501.345	-3.75	-3.75	-246.5	94.6875	94.7375
152.8	501.312	-3.74	-3.74	-246	94.687	94.737
152.79	501.28	-3.73	-3.73	-245.5	94.6865	94.7365
152.78	501.247	-3.72	-3.72	-245	94.686	94.736
152.77	501.214	-3.71	-3.71	-244.5	94.6855	94.7355
152.76	501.181	-3.7	-3.7	-244	94.685	94.735
152.75	501.148	-3.69	-3.69	-243.5	94.6845	94.7345
152.74	501.115	-3.68	-3.68	-243	94.684	94.734
152.73	501.083	-3.67	-3.67	-242.5	94.6835	94.7335
152.72	501.05	-3.66	-3.66	-242	94.683	94.733
152.71	501.017	-3.65	-3.65	-241.5	94.6825	94.7325
152.7	500.984	-3.64	-3.64	-241	94.682	94.732
152.69	500.951	-3.63	-3.63	-240.5	94.6815	94.7315
152.68	500.919	-3.62	-3.62	-240	94.681	94.731
152.67	500.886	-3.61	-3.61	-239.5	94.6805	94.7305
152.66	500.853	-3.6	-3.6	-239	94.68	94.73
152.65	500.82	-3.59	-3.59	-238.5	94.6795	94.7295
152.64	500.787	-3.58	-3.58	-238	94.679	94.729
152.63	500.755	-3.57	-3.57	-237.5	94.6785	94.7285
152.62	500.722	-3.56	-3.56	-237	94.678	94.728
152.61	500.689	-3.55	-3.55	-236.5	94.6775	94.7275
152.6	500.656	-3.54	-3.54	-236	94.677	94.727
152.59	500.623	-3.53	-3.53	-235.5	94.6765	94.7265
152.58	500.591	-3.52	-3.52	-235	94.676	94.726
152.57	500.558	-3.51	-3.51	-234.5	94.6755	94.7255
152.56	500.525	-3.5	-3.5	-234	94.675	94.725
152.55	500.492	-3.49	-3.49	-233.5	94.6745	94.7245
152.54	500.459	-3.48	-3.48	-233	94.674	94.724
152.53	500.427	-3.47	-3.47	-232.5	94.6735	94.7235
152.52	500.394	-3.46	-3.46	-232	94.673	94.723
152.51	500.361	-3.45	-3.45	-231.5	94.6725	94.7225
152.5	500.328	-3.44	-3.44	-231	94.672	94.722
152.49	500.295	-3.43	-3.43	-230.5	94.6715	94.7215
152.48	500.262	-3.42	-3.42	-230	94.671	94.721
152.47	500.23	-3.41	-3.41	-229.5	94.6705	94.7205
152.46	500.197	-3.4	-3.4	-229	94.67	94.72
152.45	500.164	-3.39	-3.39	-228.5	94.6695	94.7195
152.44	500.131	-3.38	-3.38	-228	94.669	94.719
152.43	500.098	-3.37	-3.37	-227.5	94.6685	94.7185
152.42	500.066	-3.36	-3.36	-227	94.668	94.718
152.41	500.033	-3.35	-3.35	-226.5	94.6675	94.7175
152.4	500	-3.34	-3.34	-226	94.667	94.717
152.39	499.967	-3.33	-3.33	-225.5	94.6665	94.7165
152.38	499.934	-3.32	-3.32	-225	94.666	94.716
152.37	499.902	-3.31	-3.31	-224.5	94.6655	94.7155
152.36	499.869	-3.3	-3.3	-224	94.665	94.715
152.35	499.836	-3.29	-3.29	-223.5	94.6645	94.7145
152.34	499.803	-3.28	-3.28	-223	94.664	94.714
152.33	499.77	-3.27	-3.27	-222.5	94.6635	94.7135
152.32	499.738	-3.26	-3.26	-222	94.663	94.713
152.31	499.705	-3.25	-3.25	-221.5	94.6625	94.7125
152.3	499.672	-3.24	-3.24	-221	94.662	94.712
152.29	499.639	-3.23	-3.23	-220.5	94.6615	94.7115
152.28	499.606	-3.22	-3.22	-220	94.661	94.711
152.27	499.573	-3.21	-3.21	-219.5	94.6605	94.7105
152.26	499.541	-3.2	-3.2	-219	94.66	94.71
152.25	499.508	-3.19	-3.19	-218.5	94.6595	94.7095
152.24	499.475	-3.18	-3.18	-218	94.659	94.709
152.23	499.442	-3.17	-3.17	-217.5	94.6585	94.7085
152.22	499.409	-3.16	-3.16	-217	94.658	94.708
152.21	499.377	-3.15	-3.15	-216.5	94.6575	94.7075
152.2	499.344	-3.14	-3.14	-216	94.657	94.707
152.19	499.311	-3.13	-3.13	-215.5	94.6565	94.7065
152.18	499.278	-3.12	-3.12	-215	94.656	94.706
152.17	499.245	-3.11	-3.11	-214.5	94.6555	94.7055
152.16	499.213	-3.1	-3.1	-214	94.655	94.705
152.15	499.18	-3.09	-3.09	-213.5	94.6545	94.7045
152.14	499.147	-3.08	-3.08	-213	94.654	94.704
152.13	499.114	-3.07	-3.07	-212.5	94.6535	94.7035
152.12	499.081	-3.06	-3.06	-212	94.653	94.703
152.11	499.049	-3.05	-3.05	-211.5	94.6525	94.7025
152.1	499.016	-3.04	-3.04	-211	94.652	94.702
152.09	498.983	-3.03	-3.03	-210.5	94.6515	94.7015
152.08	498.95	-3.02	-3.02	-210	94.651	94.701
152.07	498.917	-3.01	-3.01	-209.5	94.6505	94.7005
152.06	498.885	-3	-3	-209	94.65	94.7
152.05	498.852	-2.99	-2.99	-208.5	94.6495	94.6995
152.04	498.819	-2.98	-2.98	-208	94.649	94.699
152.03	498.786	-2.97	-2.97	-207.5	94.6485	94.6985
152.02	498.753	-2.96	-2.96	-207	94.648	94.698
152.01	498.72	-2.95	-2.95	-206.5	94.6475	94.6975
152	498.688	-2.94	-2.94	-206	94.647	94.697
151.99	498.655	-2.93	-2.93	-205.5	94.6465	94.6965
151.98	498.622	-2.92	-2.92	-205	94.646	94.696
151.97	498.589	-2.91	-2.91	-204.5	94.6455	94.6955
151.96	498.556	-2.9	-2.9	-204	94.645	94.695
151.95	498.524	-2.89	-2.89	-203.5	94.6445	94.6945
151.94	498.491	-2.88	-2.88	-203	94.644	94.694
151.93	498.458	-2.87	-2.87	-202.5	94.6435	94.6935
151.92	498.425	-2.86	-2.86	-202	94.643	94.693
151.91	498.392	-2.85	-2.85	-201.5	94.6425	94.6925
151.9	498.36	-2.84	-2.84	-201	94.642	94.692
151.89	498.327	-2.83	-2.83	-200.5	94.6415	94.6915
151.88	498.294	-2.82	-2.82	-200	94.641	94.691
151.87	498.261	-2.81	-2.81	-199.5	94.6405	94.6905
151.86	498.228	-2.8	-2.8	-199	94.64	94.69
151.85	498.196	-2.79	-2.79	-198.5	94.6395	94.6895
151.84	498.163	-2.78	-2.78	-198	94.639	94.689
151.83	498.13	-2.77	-2.77	-197.5	94.6385	94.6885
151.82	498.097	-2.76	-2.76	-197	94.638	94.688
151.81	498.064	-2.75	-2.75	-196.5	94.6375	94.6875
151.8	498.031	-2.74	-2.74	-196	94.637	94.687
151.79	497.999	-2.73	-2.73	-195.5	94.6365	94.6865
151.78	497.966	-2.72	-2.72	-195	94.636	94.686
151.77	497.933	-2.71	-2.71	-194.5	94.6355	94.6855
151.76	497.9	-2.7	-2.7	-194	94.635	94.685
151.75	497.867	-2.69	-2.69	-193.5	94.6345	94.6845
151.74	497.835	-2.68	-2.68	-193	94.634	94.684
151.73	497.802	-2.67	-2.67	-192.5	94.6335	94.6835
151.72	497.769	-2.66	-2.66	-192	94.633	94.683
151.71	497.736	-2.65	-2.65	-191.5	94.6325	94.6825
151.7	497.703	-2.64	-2.64	-191	94.632	94.682
151.69	497.671	-2.63	-2.63	-190.5	94.6315	94.6815
151.68	497.638	-2.62	-2.62	-190	94.631	94.681
151.67	497.605	-2.61	-2.61	-189.5	94.6305	94.6805
151.66	497.572	-2.6	-2.6	-189	94.63	94.68
151.65	497.539	-2.59	-2.59	-188.5	94.6295	94.6795
151.64	497.507	-2.58	-2.58	-188	94.629	94.679
151.63	497.474	-2.57	-2.57	-187.5	94.6285	94.6785
151.62	497.441	-2.56	-2.56	-187	94.628	94.678
151.61	497.408	-2.55	-2.55	-186.5	94.6275	94.6775
151.6	497.375	-2.54	-2.54	-186	94.627	94.677
151.59	497.343	-2.53	-2.53	-185.5	94.6265	94.6765
151.58	497.31	-2.52	-2.52	-185	94.626	94.676
151.57	497.277	-2.51	-2.51	-184.5	94.6255	94.6755
151.56	497.244	-2.5	-2.5	-184	94.625	94.675
151.55	497.211	-2.49	-2.49	-183.5	94.6245	94.6745
151.54	497.178	-2.48	-2.48	-183	94.624	94.674
151.53	497.146	-2.47	-2.47	-182.5	94.6235	94.6735
151.52	497.113	-2.46	-2.46	-182	94.623	94.673
151.51	497.08	-2.45	-2.45	-181.5	94.6225	94.6725
151.5	497.047	-2.44	-2.44	-181	94.622	94.672
151.49	497.014	-2.43	-2.43	-180.5	94.6215	94.6715
151.48	496.982	-2.42	-2.42	-180	94.621	94.671
151.47	496.949	-2.41	-2.41	-179.5	94.6205	94.6705
151.46	496.916	-2.4	-2.4	-179	94.62	94.67
151.45	496.883	-2.39	-2.39	-178.5	94.6195	94.6695
151.44	496.85	-2.38	-2.38	-178	94.619	94.669
151.43	496.818	-2.37	-2.37	-177.5	94.6185	94.6685
151.42	496.785	-2.36	-2.36	-177	94.618	94.668
151.41	496.752	-2.35	-2.35	-176.5	94.6175	94.6675
151.4	496.719	-2.34	-2.34	-176	94.617	94.667
151.39	496.686	-2.33	-2.33	-175.5	94.6165	94.6665
151.38	496.654	-2.32	-2.32	-175	94.616	94.666
151.37	496.621	-2.31	-2.31	-174.5	94.6155	94.6655
151.36	496.588	-2.3	-2.3	-174	94.615	94.665
151.35	496.555	-2.29	-2.29	-173.5	94.6145	94.6645
151.34	496.522	-2.28	-2.28	-173	94.614	94.664
151.33	496.49	-2.27	-2.27	-172.5	94.6135	94.6635
151.32	496.457	-2.26	-2.26	-172	94.613	94.663
151.31	496.424	-2.25	-2.25	-171.5	94.6125	94.6625
151.3	496.391	-2.24	-2.24	-171	94.612	94.662
151.29	496.358	-2.23	-2.23	-170.5	94.6115	94.6615
151.28	496.325	-2.22	-2.22	-170	94.611	94.661
151.27	496.293	-2.21	-2.21	-169.5	94.6105	94.6605
151.26	496.26	-2.2	-2.2	-169	94.61	94.66
151.25	496.227	-2.19	-2.19	-168.5	94.6095	94.6595
151.24	496.194	-2.18	-2.18	-168	94.609	94.659
151.23	496.161	-2.17	-2.17	-167.5	94.6085	94.6585
151.22	496.129	-2.16	-2.16	-167	94.608	94.658
151.21	496.096	-2.15	-2.15	-166.5	94.6075	94.6575
151.2	496.063	-2.14	-2.14	-166	94.607	94.657
151.19	496.03	-2.13	-2.13	-165.5	94.6065	94.6565
151.18	495.997	-2.12	-2.12	-165	94.606	94.656
151.17	495.965	-2.11	-2.11	-164.5	94.6055	94.6555
151.16	495.932	-2.1	-2.1	-164	94.605	94.655
151.15	495.899	-2.09	-2.09	-163.5	94.6045	94.6545
151.14	495.866	-2.08	-2.08	-163	94.604	94.654
151.13	495.833	-2.07	-2.07	-162.5	94.6035	94.6535
151.12	495.801	-2.06	-2.06	-162	94.603	94.653
151.11	495.768	-2.05	-2.05	-161.5	94.6025	94.6525
151.1	495.735	-2.04	-2.04	-161	94.602	94.652
151.09	495.702	-2.03	-2.03	-160.5	94.6015	94.6515
151.08	495.669	-2.02	-2.02	-160	94.601	94.651
151.07	495.636	-2.01	-2.01	-159.5	94.6005	94.6505
151.06	495.604	-2	-2	-159	94.6	94.65
151.05	495.571	-1.99	-1.99	-158.5	94.5995	94.6495
151.04	495.538	-1.98	-1.98	-158	94.599	94.649
151.03	495.505	-1.97	-1.97	-157.5	94.5985	94.6485
151.02	495.472	-1.96	-1.96	-157	94.598	94.648
151.01	495.44	-1.95	-1.95	-156.5	94.5975	94.6475
151	495.407	-1.94	-1.94	-156	94.597	94.647
150.99	495.374	-1.93	-1.93	-155.5	94.5965	94.6465
150.98	495.341	-1.92	-1.92	-155	94.596	94.646
150.97	495.308	-1.91	-1.91	-154.5	94.5955	94.6455
150.96	495.276	-1.9	-1.9	-154	94.595	94.645
150.95	495.243	-1.89	-1.89	-153.5	94.5945	94.6445
150.94	495.21	-1.88	-1.88	-153	94.594	94.644
150.93	495.177	-1.87	-1.87	-152.5	94.5935	94.6435
150.92	495.144	-1.86	-1.86	-152	94.593	94.643
150.91	495.112	-1.85	-1.85	-151.5	94.5925	94.6425
150.9	495.079	-1.84	-1.84	-151	94.592	94.642
150.89	495.046	-1.83	-1.83	-150.5	94.5915	94.6415
150.88	495.013	-1.82	-1.82	-150	94.591	94.641
150.87	494.98	-1.81	-1.81	-149.5	94.5905	94.6405
150.86	494.948	-1.8	-1.8	-149	94.59	94.64
150.85	494.915	-1.79	-1.79	-148.5	94.5895	94.6395
150.84	494.882	-1.78	-1.78	-148	94.589	94.639
150.83	494.849	-1.77	-1.77	-147.5	94.5885	94.6385
150.82	494.816	-1.76	-1.76	-147	94.588	94.638
150.81	494.783	-1.75	-1.75	-146.5	94.5875	94.6375
150.8	494.751	-1.74	-1.74	-146	94.587	94.637
150.79	494.718	-1.73	-1.73	-145.5	94.5865	94.6365
150.78	494.685	-1.72	-1.72	-145	94.586	94.636
150.77	494.652	-1.71	-1.71	-144.5	94.5855	94.6355
150.76	494.619	-1.7	-1.7	-144	94.585	94.635
150.75	494.587	-1.69	-1.69	-143.5	94.5845	94.6345
150.74	494.554	-1.68	-1.68	-143	94.584	94.634
150.73	494.521	-1.67	-1.67	-142.5	94.5835	94.6335
150.72	494.488	-1.66	-1.66	-142	94.583	94.633
150.71	494.455	-1.65	-1.65	-141.5	94.5825	94.6325
150.7	494.423	-1.64	-1.64	-141	94.582	94.632
150.69	494.39	-1.63	-1.63	-140.5	94.5815	94.6315
150.68	494.357	-1.62	-1.62	-140	94.581	94.631
150.67	494.324	-1.61	-1.61	-139.5	94.5805	94.6305
150.66	494.291	-1.6	-1.6	-139	94.58	94.63
150.65	494.259	-1.59	-1.59	-138.5	94.5795	94.6295
150.64	494.226	-1.58	-1.58	-138	94.579	94.629
150.63	494.193	-1.57	-1.57	-137.5	94.5785	94.6285
150.62	494.16	-1.56	-1.56	-137	94.578	94.628
150.61	494.127	-1.55	-1.55	-136.5	94.5775	94.6275
150.6	494.094	-1.54	-1.54	-136	94.577	94.627
150.59	494.062	-1.53	-1.53	-135.5	94.5765	94.6265
150.58	494.029	-1.52	-1.52	-135	94.576	94.626
150.57	493.996	-1.51	-1.51	-134.5	94.5755	94.6255
150.56	493.963	-1.5	-1.5	-134	94.575	94.625
150.55	493.93	-1.49	-1.49	-133.5	94.5745	94.6245
150.54	493.898	-1.48	-1.48	-133	94.574	94.624
150.53	493.865	-1.47	-1.47	-132.5	94.5735	94.6235
150.52	493.832	-1.46	-1.46	-132	94.573	94.623
150.51	493.799	-1.45	-1.45	-131.5	94.5725	94.6225
150.5	493.766	-1.44	-1.44	-131	94.572	94.622
150.49	493.734	-1.43	-1.43	-130.5	94.5715	94.6215
150.48	493.701	-1.42	-1.42	-130	94.571	94.621
150.47	493.668	-1.41	-1.41	-129.5	94.5705	94.6205
150.46	493.635	-1.4	-1.4	-129	94.57	94.62
150.45	493.602	-1.39	-1.39	-128.5	94.5695	94.6195
150.44	493.57	-1.38	-1.38	-128	94.569	94.619
150.43	493.537	-1.37	-1.37	-127.5	94.5685	94.6185
150.42	493.504	-1.36	-1.36	-127	94.568	94.618
150.41	493.471	-1.35	-1.35	-126.5	94.5675	94.6175
150.4	493.438	-1.34	-1.34	-126	94.567	94.617
150.39	493.406	-1.33	-1.33	-125.5	94.5665	94.6165
150.38	493.373	-1.32	-1.32	-125	94.566	94.616
150.37	493.34	-1.31	-1.31	-124.5	94.5655	94.6155
150.36	493.307	-1.3	-1.3	-124	94.565	94.615
150.35	493.274	-1.29	-1.29	-123.5	94.5645	94.6145
150.34	493.241	-1.28	-1.28	-123	94.564	94.614
150.33	493.209	-1.27	-1.27	-122.5	94.5635	94.6135
150.32	493.176	-1.26	-1.26	-122	94.563	94.613
150.31	493.143	-1.25	-1.25	-121.5	94.5625	94.6125
150.3	493.11	-1.24	-1.24	-121	94.562	94.612
150.29	493.077	-1.23	-1.23	-120.5	94.5615	94.6115
150.28	493.045	-1.22	-1.22	-120	94.561	94.611
150.27	493.012	-1.21	-1.21	-119.5	94.5605	94.6105
150.26	492.979	-1.2	-1.2	-119	94.56	94.61
150.25	492.946	-1.19	-1.19	-118.5	94.5595	94.6095
150.24	492.913	-1.18	-1.18	-118	94.559	94.609
150.23	492.881	-1.17	-1.17	-117.5	94.5585	94.6085
150.22	492.848	-1.16	-1.16	-117	94.558	94.608
150.21	492.815	-1.15	-1.15	-116.5	94.5575	94.6075
150.2	492.782	-1.14	-1.14	-116	94.557	94.607
150.19	492.749	-1.13	-1.13	-115.5	94.5565	94.6065
150.18	492.717	-1.12	-1.12	-115	94.556	94.606
150.17	492.684	-1.11	-1.11	-114.5	94.5555	94.6055
150.16	492.651	-1.1	-1.1	-114	94.555	94.605
150.15	492.618	-1.09	-1.09	-113.5	94.5545	94.6045
150.14	492.585	-1.08	-1.08	-113	94.554	94.604
150.13	492.552	-1.07	-1.07	-112.5	94.5535	94.6035
150.12	492.52	-1.06	-1.06	-112	94.553	94.603
150.11	492.487	-1.05	-1.05	-111.5	94.5525	94.6025
150.1	492.454	-1.04	-1.04	-111	94.552	94.602
150.09	492.421	-1.03	-1.03	-110.5	94.5515	94.6015
150.08	492.388	-1.02	-1.02	-110	94.551	94.601
150.07	492.356	-1.01	-1.01	-109.5	94.5505	94.6005
150.06	492.323	-1	-1	-109	94.55	94.6
150.05	492.29	-0.99	-0.99	-108.5	94.5495	94.5995
150.04	492.257	-0.98	-0.98	-108	94.549	94.599
150.03	492.224	-0.97	-0.97	-107.5	94.5485	94.5985
150.02	492.192	-0.96	-0.96	-107	94.548	94.598
150.01	492.159	-0.95	-0.95	-106.5	94.5475	94.5975
150	492.126	-0.94	-0.94	-106	94.547	94.597
149.99	492.093	-0.93	-0.93	-105.5	94.5465	94.5965
149.98	492.06	-0.92	-0.92	-105	94.546	94.596
149.97	492.028	-0.91	-0.91	-104.5	94.5455	94.5955
149.96	491.995	-0.9	-0.9	-104	94.545	94.595
149.95	491.962	-0.89	-0.89	-103.5	94.5445	94.5945
149.94	491.929	-0.88	-0.88	-103	94.544	94.594
149.93	491.896	-0.87	-0.87	-102.5	94.5435	94.5935
149.92	491.864	-0.86	-0.86	-102	94.543	94.593
149.91	491.831	-0.85	-0.85	-101.5	94.5425	94.5925
149.9	491.798	-0.84	-0.84	-101	94.542	94.592
149.89	491.765	-0.83	-0.83	-100.5	94.5415	94.5915
149.88	491.732	-0.82	-0.82	-100	94.541	94.591
149.87	491.699	-0.81	-0.81	-99.5	94.5405	94.5905
149.86	491.667	-0.8	-0.8	-98.99	94.54	94.59
149.85	491.634	-0.79	-0.79	-98.5	94.5395	94.5895
149.84	491.601	-0.78	-0.78	-98	94.539	94.589
149.83	491.568	-0.77	-0.77	-97.5	94.5385	94.5885
149.82	491.535	-0.76	-0.76	-97	94.538	94.588
149.81	491.503	-0.75	-0.75	-96.5	94.5375	94.5875
149.8	491.47	-0.74	-0.74	-96	94.537	94.587
149.79	491.437	-0.73	-0.73	-95.5	94.5365	94.5865
149.78	491.404	-0.72	-0.72	-94.99	94.536	94.586
149.77	491.371	-0.71	-0.71	-94.5	94.5355	94.5855
149.76	491.339	-0.7	-0.7	-94	94.535	94.585
149.75	491.306	-0.69	-0.69	-93.5	94.5345	94.5845
149.74	491.273	-0.68	-0.68	-93	94.534	94.584
149.73	491.24	-0.67	-0.67	-92.5	94.5335	94.5835
149.72	491.207	-0.66	-0.66	-92	94.533	94.583
149.71	491.175	-0.65	-0.65	-91.5	94.5325	94.5825
149.7	491.142	-0.64	-0.64	-91	94.532	94.582
149.69	491.109	-0.63	-0.63	-90.5	94.5315	94.5815
149.68	491.076	-0.62	-0.62	-90	94.531	94.581
149.67	491.043	-0.61	-0.61	-89.5	94.5305	94.5805
149.66	491.01	-0.6	-0.6	-89	94.53	94.58
149.65	490.978	-0.59	-0.59	-88.5	94.5295	94.5795
149.64	490.945	-0.58	-0.58	-88	94.529	94.579
149.63	490.912	-0.57	-0.57	-87.5	94.5285	94.5785
149.62	490.879	-0.56	-0.56	-87	94.528	94.578
149.61	490.846	-0.55	-0.55	-86.49	94.5275	94.5775
149.6	490.814	-0.54	-0.54	-86	94.527	94.577
149.59	490.781	-0.53	-0.53	-85.5	94.5265	94.5765
149.58	490.748	-0.52	-0.52	-85	94.526	94.576
149.57	490.715	-0.51	-0.51	-84.5	94.5255	94.5755
149.56	490.682	-0.5	-0.5	-84	94.525	94.575
149.55	490.65	-0.49	-0.49	-83.5	94.5245	94.5745
149.54	490.617	-0.48	-0.48	-83	94.524	94.574
149.53	490.584	-0.47	-0.47	-82.49	94.5235	94.5735
149.52	490.551	-0.46	-0.46	-82	94.523	94.573
149.51	490.518	-0.45	-0.45	-81.5	94.5225	94.5725
149.5	490.486	-0.44	-0.44	-81	94.522	94.572
149.49	490.453	-0.43	-0.43	-80.5	94.5215	94.5715
149.48	490.42	-0.42	-0.42	-80	94.521	94.571
149.47	490.387	-0.41	-0.41	-79.5	94.5205	94.5705
149.46	490.354	-0.4	-0.4	-79	94.52	94.57
149.45	490.322	-0.39	-0.39	-78.5	94.5195	94.5695
149.44	490.289	-0.38	-0.38	-77.99	94.519	94.569
149.43	490.256	-0.37	-0.37	-77.5	94.5185	94.5685
149.42	490.223	-0.36	-0.36	-77	94.518	94.568
149.41	490.19	-0.35	-0.35	-76.5	94.5175	94.5675
149.4	490.157	-0.34	-0.34	-76	94.517	94.567
149.39	490.125	-0.33	-0.33	-75.5	94.5165	94.5665
149.38	490.092	-0.32	-0.32	-75	94.516	94.566
149.37	490.059	-0.31	-0.31	-74.5	94.5155	94.5655
149.36	490.026	-0.3	-0.3	-73.99	94.515	94.565
149.35	489.993	-0.29	-0.29	-73.5	94.5145	94.5645
149.34	489.961	-0.28	-0.28	-73	94.514	94.564
149.33	489.928	-0.27	-0.27	-72.5	94.5135	94.5635
149.32	489.895	-0.26	-0.26	-72	94.513	94.563
149.31	489.862	-0.25	-0.25	-71.5	94.5125	94.5625
149.3	489.829	-0.24	-0.24	-71	94.512	94.562
149.29	489.797	-0.23	-0.23	-70.5	94.5115	94.5615
149.28	489.764	-0.22	-0.22	-69.99	94.511	94.561
149.27	489.731	-0.21	-0.21	-69.5	94.5105	94.5605
149.26	489.698	-0.2	-0.2	-69	94.51	94.56
149.25	489.665	-0.19	-0.19	-68.5	94.5095	94.5595
149.24	489.633	-0.18	-0.18	-68	94.509	94.559
149.23	489.6	-0.17	-0.17	-67.5	94.5085	94.5585
149.22	489.567	-0.16	-0.16	-67	94.508	94.558
149.21	489.534	-0.15	-0.15	-66.5	94.5075	94.5575
149.2	489.501	-0.14	-0.14	-66	94.507	94.557
149.19	489.469	-0.13	-0.13	-65.49	94.5065	94.5565
149.18	489.436	-0.12	-0.12	-65	94.506	94.556
149.17	489.403	-0.11	-0.11	-64.5	94.5055	94.5555
149.16	489.37	-0.1	-0.1	-64	94.505	94.555
149.15	489.337	-0.09	-0.09	-63.5	94.5045	94.5545
149.14	489.304	-0.08	-0.08	-63	94.504	94.554
149.13	489.272	-0.07	-0.07	-62.5	94.5035	94.5535
149.12	489.239	-0.06	-0.06	-62	94.503	94.553
149.11	489.206	-0.05	-0.05	-61.49	94.5025	94.5525
149.1	489.173	-0.04	-0.04	-61	94.502	94.552
149.09	489.14	-0.03	-0.03	-60.5	94.5015	94.5515
149.08	489.108	-0.02	-0.02	-60	94.501	94.551
149.07	489.075	-0.01	-0.01	-59.5	94.5005	94.5505
149.06	489.042	0	0	-59	94.5	94.55	Assuming 59+/-11 kyr hiatus at 0m
149.05	489.009	0.01	0.01	0.9	94.4401	94.4901
149.04	488.976	0.02	0.02	1.8	94.4392	94.4892
149.03	488.944	0.03	0.03	2.71	94.4383	94.4883
149.02	488.911	0.04	0.04	3.62	94.4374	94.4874
149.01	488.878	0.05	0.05	4.53	94.4365	94.4865
149	488.845	0.06	0.06	5.44	94.4356	94.4856
148.99	488.812	0.07	0.07	6.35	94.4347	94.4847
148.98	488.78	0.08	0.08	7.26	94.4337	94.4837
148.97	488.747	0.09	0.09	8.17	94.4328	94.4828
148.96	488.714	0.1	0.1	9.08	94.4319	94.4819
148.95	488.681	0.11	0.11	9.99	94.431	94.481
148.94	488.648	0.12	0.12	10.9	94.4301	94.4801
148.93	488.615	0.13	0.13	11.81	94.4292	94.4792
148.92	488.583	0.14	0.14	12.71	94.4283	94.4783
148.91	488.55	0.15	0.15	13.62	94.4274	94.4774
148.9	488.517	0.16	0.16	14.53	94.4265	94.4765
148.89	488.484	0.17	0.17	15.44	94.4256	94.4756
148.88	488.451	0.18	0.18	16.35	94.4246	94.4746
148.87	488.419	0.19	0.19	17.26	94.4237	94.4737
148.86	488.386	0.2	0.2	18.17	94.4228	94.4728
148.85	488.353	0.21	0.21	19.08	94.4219	94.4719
148.84	488.32	0.22	0.22	19.99	94.421	94.471
148.83	488.287	0.23	0.23	20.9	94.4201	94.4701
148.82	488.255	0.24	0.24	21.81	94.4192	94.4692
148.81	488.222	0.25	0.25	22.72	94.4183	94.4683
148.8	488.189	0.26	0.26	23.62	94.4174	94.4674
148.79	488.156	0.27	0.27	24.53	94.4165	94.4665
148.78	488.123	0.28	0.28	25.44	94.4156	94.4656
148.77	488.091	0.29	0.29	26.35	94.4147	94.4647
148.76	488.058	0.3	0.3	27.26	94.4137	94.4637
148.75	488.025	0.31	0.31	28.17	94.4128	94.4628
148.74	487.992	0.32	0.32	29.08	94.4119	94.4619
148.73	487.959	0.33	0.33	29.99	94.411	94.461
148.72	487.927	0.34	0.34	30.9	94.4101	94.4601
148.71	487.894	0.35	0.35	31.81	94.4092	94.4592
148.7	487.861	0.36	0.36	32.72	94.4083	94.4583
148.69	487.828	0.37	0.37	33.63	94.4074	94.4574
148.68	487.795	0.38	0.38	34.53	94.4065	94.4565
148.67	487.762	0.39	0.39	35.44	94.4056	94.4556
148.66	487.73	0.4	0.4	36.35	94.4047	94.4547
148.65	487.697	0.41	0.41	37.26	94.4037	94.4537
148.64	487.664	0.42	0.42	38.17	94.4028	94.4528
148.63	487.631	0.43	0.43	39.08	94.4019	94.4519
148.62	487.598	0.44	0.44	39.99	94.401	94.451
148.61	487.566	0.45	0.45	40.9	94.4001	94.4501
148.6	487.533	0.46	0.46	41.81	94.3992	94.4492
148.59	487.5	0.47	0.47	42.72	94.3983	94.4483
148.58	487.467	0.48	0.48	43.63	94.3974	94.4474
148.57	487.434	0.49	0.49	44.54	94.3965	94.4465
148.56	487.402	0.5	0.5	45.44	94.3956	94.4456
148.55	487.369	0.51	0.51	46.35	94.3946	94.4446
148.54	487.336	0.52	0.52	47.26	94.3937	94.4437
148.53	487.303	0.53	0.53	48.17	94.3928	94.4428
148.52	487.27	0.54	0.54	49.08	94.3919	94.4419
148.51	487.238	0.55	0.55	49.99	94.391	94.441
148.5	487.205	0.56	0.56	50.9	94.3901	94.4401
148.49	487.172	0.57	0.57	51.81	94.3892	94.4392
148.48	487.139	0.58	0.58	52.72	94.3883	94.4383
148.47	487.106	0.59	0.59	53.63	94.3874	94.4374
148.46	487.073	0.6	0.6	54.54	94.3865	94.4365
148.45	487.041	0.61	0.61	55.45	94.3856	94.4356
148.44	487.008	0.62	0.62	56.35	94.3847	94.4347
148.43	486.975	0.63	0.63	57.26	94.3837	94.4337
148.42	486.942	0.64	0.64	58.17	94.3828	94.4328
148.41	486.909	0.65	0.65	59.08	94.3819	94.4319
148.4	486.877	0.66	0.66	59.99	94.381	94.431
148.39	486.844	0.67	0.67	60.9	94.3801	94.4301
148.38	486.811	0.68	0.68	61.81	94.3792	94.4292
148.37	486.778	0.69	0.69	62.72	94.3783	94.4283
148.36	486.745	0.7	0.7	63.63	94.3774	94.4274
148.35	486.713	0.71	0.71	64.54	94.3765	94.4265
148.34	486.68	0.72	0.72	65.45	94.3756	94.4256
148.33	486.647	0.73	0.73	66.36	94.3746	94.4246
148.32	486.614	0.74	0.74	67.26	94.3737	94.4237
148.31	486.581	0.75	0.75	68.17	94.3728	94.4228
148.3	486.549	0.76	0.76	69.08	94.3719	94.4219
148.29	486.516	0.77	0.77	69.99	94.371	94.421
148.28	486.483	0.78	0.78	70.9	94.3701	94.4201
148.27	486.45	0.79	0.79	71.81	94.3692	94.4192
148.26	486.417	0.8	0.8	72.72	94.3683	94.4183
148.25	486.385	0.81	0.81	73.63	94.3674	94.4174
148.24	486.352	0.82	0.82	74.54	94.3665	94.4165
148.23	486.319	0.83	0.83	75.45	94.3655	94.4155
148.22	486.286	0.84	0.84	76.36	94.3646	94.4146
148.21	486.253	0.85	0.85	77.27	94.3637	94.4137
148.2	486.22	0.86	0.86	78.17	94.3628	94.4128
148.19	486.188	0.87	0.87	79.08	94.3619	94.4119
148.18	486.155	0.88	0.88	79.99	94.361	94.411
148.17	486.122	0.89	0.89	80.9	94.3601	94.4101
148.16	486.089	0.9	0.9	81.81	94.3592	94.4092
148.15	486.056	0.91	0.91	82.72	94.3583	94.4083
148.14	486.024	0.92	0.92	83.63	94.3574	94.4074
148.13	485.991	0.93	0.93	84.54	94.3565	94.4065
148.12	485.958	0.94	0.94	85.45	94.3556	94.4056
148.11	485.925	0.95	0.95	86.36	94.3546	94.4046
148.1	485.892	0.96	0.96	87.27	94.3537	94.4037
148.09	485.86	0.97	0.97	88.18	94.3528	94.4028
148.08	485.827	0.98	0.98	89.08	94.3519	94.4019
148.07	485.794	0.99	0.99	89.99	94.351	94.401
148.06	485.761	1	1	90.9	94.3501	94.4001
148.05	485.728	1.01	1.01	91.81	94.3492	94.3992
148.04	485.696	1.02	1.02	92.72	94.3483	94.3983
148.03	485.663	1.03	1.03	93.63	94.3474	94.3974
148.02	485.63	1.04	1.04	94.54	94.3465	94.3965
148.01	485.597	1.05	1.05	95.45	94.3456	94.3956
148	485.564	1.06	1.06	96.36	94.3446	94.3946
147.99	485.531	1.07	1.07	97.27	94.3437	94.3937
147.98	485.499	1.08	1.08	98.18	94.3428	94.3928
147.97	485.466	1.09	1.09	99.09	94.3419	94.3919
147.96	485.433	1.1	1.1	100	94.341	94.391
147.95	485.4	1.11	1.11	101.2	94.3398	94.3898
147.94	485.367	1.12	1.12	102.4	94.3386	94.3886
147.93	485.335	1.13	1.13	103.6	94.3374	94.3874
147.92	485.302	1.14	1.14	104.8	94.3362	94.3862
147.91	485.269	1.15	1.15	106	94.335	94.385
147.9	485.236	1.16	1.16	107.2	94.3338	94.3838
147.89	485.203	1.17	1.17	108.4	94.3326	94.3826
147.88	485.171	1.18	1.18	109.6	94.3314	94.3814
147.87	485.138	1.19	1.19	110.8	94.3302	94.3802
147.86	485.105	1.2	1.2	112	94.329	94.379
147.85	485.072	1.21	1.21	113.2	94.3278	94.3778
147.84	485.039	1.22	1.22	114.4	94.3266	94.3766
147.83	485.007	1.23	1.23	115.6	94.3254	94.3754
147.82	484.974	1.24	1.24	116.8	94.3242	94.3742
147.81	484.941	1.25	1.25	118	94.323	94.373
147.8	484.908	1.26	1.26	119.2	94.3218	94.3718
147.79	484.875	1.27	1.27	120.4	94.3206	94.3706
147.78	484.843	1.28	1.28	121.6	94.3194	94.3694
147.77	484.81	1.29	1.29	122.8	94.3182	94.3682
147.76	484.777	1.3	1.3	124	94.317	94.367
147.75	484.744	1.31	1.31	125.2	94.3158	94.3658
147.74	484.711	1.32	1.32	126.4	94.3146	94.3646
147.73	484.678	1.33	1.33	127.6	94.3134	94.3634
147.72	484.646	1.34	1.34	128.8	94.3122	94.3622
147.71	484.613	1.35	1.35	130	94.311	94.361
147.7	484.58	1.36	1.36	131.2	94.3098	94.3598
147.69	484.547	1.37	1.37	132.4	94.3086	94.3586
147.68	484.514	1.38	1.38	133.6	94.3074	94.3574
147.67	484.482	1.39	1.39	134.8	94.3062	94.3562
147.66	484.449	1.4	1.4	136	94.305	94.355
147.65	484.416	1.41	1.41	137.2	94.3038	94.3538
147.64	484.383	1.42	1.42	138.4	94.3026	94.3526
147.63	484.35	1.43	1.43	139.6	94.3014	94.3514
147.62	484.318	1.44	1.44	140.8	94.3002	94.3502
147.61	484.285	1.45	1.45	142	94.299	94.349
147.6	484.252	1.46	1.46	143.2	94.2978	94.3478
147.59	484.219	1.47	1.47	144.4	94.2966	94.3466
147.58	484.186	1.48	1.48	145.6	94.2954	94.3454
147.57	484.154	1.49	1.49	146.8	94.2942	94.3442
147.56	484.121	1.5	1.5	148	94.293	94.343
147.55	484.088	1.51	1.51	149.1	94.2919	94.3419
147.54	484.055	1.52	1.52	150.2	94.2908	94.3408
147.53	484.022	1.53	1.53	151.3	94.2897	94.3397
147.52	483.99	1.54	1.54	152.4	94.2886	94.3386
147.51	483.957	1.55	1.55	153.5	94.2875	94.3375
147.5	483.924	1.56	1.56	154.6	94.2864	94.3364
147.49	483.891	1.57	1.57	155.7	94.2853	94.3353
147.48	483.858	1.58	1.58	156.8	94.2842	94.3342
147.47	483.825	1.59	1.59	157.9	94.2831	94.3331
147.46	483.793	1.6	1.6	159	94.282	94.332
147.45	483.76	1.61	1.61	160.1	94.2809	94.3309
147.44	483.727	1.62	1.61	160.1	94.2809	94.3309	bentonite A
147.43	483.694	1.63	1.61	160.1	94.2809	94.3309	bentonite A
147.42	483.661	1.64	1.61	160.1	94.2809	94.3309	bentonite A
147.41	483.629	1.65	1.61	160.1	94.2809	94.3309	bentonite A
147.4	483.596	1.66	1.61	160.1	94.2809	94.3309	bentonite A
147.39	483.563	1.67	1.61	160.1	94.2809	94.3309	bentonite A
147.38	483.53	1.68	1.61	160.1	94.2809	94.3309	bentonite A
147.37	483.497	1.69	1.61	160.1	94.2809	94.3309	bentonite A
147.36	483.465	1.7	1.61	160.1	94.2809	94.3309	bentonite A
147.35	483.432	1.71	1.61	160.1	94.2809	94.3309	bentonite A
147.34	483.399	1.72	1.61	160.1	94.2809	94.3309	bentonite A
147.33	483.366	1.73	1.61	160.1	94.2809	94.3309	bentonite A
147.32	483.333	1.74	1.61	160.1	94.2809	94.3309	bentonite A
147.31	483.301	1.75	1.61	160.1	94.2809	94.3309	bentonite A
147.3	483.268	1.76	1.61	160.1	94.2809	94.3309	bentonite A
147.29	483.235	1.77	1.61	160.1	94.2809	94.3309	bentonite A
147.28	483.202	1.78	1.61	160.1	94.2809	94.3309	bentonite A
147.27	483.169	1.79	1.62	161.2	94.2798	94.3298
147.26	483.136	1.8	1.63	162.3	94.2787	94.3287
147.25	483.104	1.81	1.64	163.4	94.2776	94.3276
147.24	483.071	1.82	1.65	164.5	94.2765	94.3265
147.23	483.038	1.83	1.66	165.6	94.2754	94.3254
147.22	483.005	1.84	1.67	166.7	94.2743	94.3243
147.21	482.972	1.85	1.68	167.8	94.2732	94.3232
147.2	482.94	1.86	1.69	168.9	94.2721	94.3221
147.19	482.907	1.87	1.7	170	94.271	94.321
147.18	482.874	1.88	1.71	171.05	94.27	94.32
147.17	482.841	1.89	1.72	172.1	94.2689	94.3189
147.16	482.808	1.9	1.73	173.15	94.2679	94.3179
147.15	482.776	1.91	1.74	174.2	94.2668	94.3168
147.14	482.743	1.92	1.75	175.25	94.2658	94.3158
147.13	482.71	1.93	1.76	176.3	94.2647	94.3147
147.12	482.677	1.94	1.77	177.35	94.2637	94.3137
147.11	482.644	1.95	1.78	178.4	94.2626	94.3126
147.1	482.612	1.96	1.79	179.45	94.2615	94.3115
147.09	482.579	1.97	1.8	180.5	94.2605	94.3105
147.08	482.546	1.98	1.81	181.55	94.2595	94.3094
147.07	482.513	1.99	1.82	182.6	94.2584	94.3084
147.06	482.48	2	1.83	183.65	94.2574	94.3073
147.05	482.448	2.01	1.84	184.7	94.2563	94.3063
147.04	482.415	2.02	1.85	185.75	94.2553	94.3053
147.03	482.382	2.03	1.86	186.8	94.2542	94.3042
147.02	482.349	2.04	1.87	187.85	94.2532	94.3032
147.01	482.316	2.05	1.88	188.9	94.2521	94.3021
147	482.283	2.06	1.89	189.95	94.2511	94.3011
146.99	482.251	2.07	1.9	191	94.25	94.3
146.98	482.218	2.08	1.91	192	94.249	94.299
146.97	482.185	2.09	1.92	193	94.248	94.298
146.96	482.152	2.1	1.93	194	94.247	94.297
146.95	482.119	2.11	1.94	195	94.246	94.296
146.94	482.087	2.12	1.95	196	94.245	94.295
146.93	482.054	2.13	1.96	197	94.244	94.294
146.92	482.021	2.14	1.97	198	94.243	94.293
146.91	481.988	2.15	1.98	199	94.242	94.292
146.9	481.955	2.16	1.99	200	94.241	94.291
146.89	481.923	2.17	2	201	94.24	94.29
146.88	481.89	2.18	2.01	202	94.239	94.289
146.87	481.857	2.19	2.02	203	94.238	94.288
146.86	481.824	2.2	2.03	204	94.237	94.287
146.85	481.791	2.21	2.04	205	94.236	94.286
146.84	481.759	2.22	2.05	206	94.235	94.285
146.83	481.726	2.23	2.06	207	94.234	94.284
146.82	481.693	2.24	2.07	208	94.233	94.283
146.81	481.66	2.25	2.08	209	94.232	94.282
146.8	481.627	2.26	2.09	210	94.231	94.281
146.79	481.594	2.27	2.1	211	94.23	94.28
146.78	481.562	2.28	2.11	212	94.229	94.279
146.77	481.529	2.29	2.12	213	94.228	94.278
146.76	481.496	2.3	2.13	214	94.227	94.277
146.75	481.463	2.31	2.14	215	94.226	94.276
146.74	481.43	2.32	2.15	216	94.225	94.275
146.73	481.398	2.33	2.16	217	94.224	94.274
146.72	481.365	2.34	2.17	218	94.223	94.273
146.71	481.332	2.35	2.18	219	94.222	94.272
146.7	481.299	2.36	2.19	220	94.221	94.271
146.69	481.266	2.37	2.2	221	94.22	94.27
146.68	481.234	2.38	2.21	222	94.219	94.269
146.67	481.201	2.39	2.22	223	94.218	94.268
146.66	481.168	2.4	2.23	224	94.217	94.267
146.65	481.135	2.41	2.24	225	94.216	94.266
146.64	481.102	2.42	2.25	226	94.215	94.265
146.63	481.07	2.43	2.26	227	94.214	94.264
146.62	481.037	2.44	2.27	228	94.213	94.263
146.61	481.004	2.45	2.28	229	94.212	94.262
146.6	480.971	2.46	2.29	230	94.211	94.261
146.59	480.938	2.47	2.3	231	94.21	94.26
146.58	480.906	2.48	2.31	232.15	94.2089	94.2589
146.57	480.873	2.49	2.32	233.3	94.2077	94.2577
146.56	480.84	2.5	2.33	234.45	94.2066	94.2566
146.55	480.807	2.51	2.34	235.6	94.2054	94.2554
146.54	480.774	2.52	2.35	236.75	94.2043	94.2542
146.53	480.741	2.53	2.36	237.9	94.2031	94.2531
146.52	480.709	2.54	2.37	239.05	94.202	94.252
146.51	480.676	2.55	2.38	240.2	94.2008	94.2508
146.5	480.643	2.56	2.39	241.35	94.1997	94.2497
146.49	480.61	2.57	2.4	242.5	94.1985	94.2485
146.48	480.577	2.58	2.41	243.65	94.1974	94.2473
146.47	480.545	2.59	2.42	244.8	94.1962	94.2462
146.46	480.512	2.6	2.43	245.95	94.1951	94.2451
146.45	480.479	2.61	2.44	247.1	94.1939	94.2439
146.44	480.446	2.62	2.45	248.25	94.1928	94.2428
146.43	480.413	2.63	2.46	249.4	94.1916	94.2416
146.42	480.381	2.64	2.47	250.55	94.1905	94.2405
146.41	480.348	2.65	2.48	251.7	94.1893	94.2393
146.4	480.315	2.66	2.49	252.85	94.1882	94.2382
146.39	480.282	2.67	2.5	254	94.187	94.237
146.38	480.249	2.68	2.51	256	94.185	94.235
146.37	480.217	2.69	2.52	258	94.183	94.233
146.36	480.184	2.7	2.53	260	94.181	94.231
146.35	480.151	2.71	2.54	262	94.179	94.229
146.34	480.118	2.72	2.55	264	94.177	94.227
146.33	480.085	2.73	2.56	266	94.175	94.225
146.32	480.052	2.74	2.57	268	94.173	94.223
146.31	480.02	2.75	2.58	270	94.171	94.221
146.3	479.987	2.76	2.59	272	94.169	94.219
146.29	479.954	2.77	2.6	274	94.167	94.217
146.28	479.921	2.78	2.61	276	94.165	94.215
146.27	479.888	2.79	2.62	278	94.163	94.213
146.26	479.856	2.8	2.63	280	94.161	94.211
146.25	479.823	2.81	2.64	282	94.159	94.209
146.24	479.79	2.82	2.65	284	94.157	94.207
146.23	479.757	2.83	2.66	286	94.155	94.205
146.22	479.724	2.84	2.67	288	94.153	94.203
146.21	479.692	2.85	2.68	290	94.151	94.201
146.2	479.659	2.86	2.69	292	94.149	94.199
146.19	479.626	2.87	2.7	294	94.147	94.197
146.18	479.593	2.88	2.71	295.2	94.1458	94.1958
146.17	479.56	2.89	2.72	296.4	94.1446	94.1946
146.16	479.528	2.9	2.73	297.6	94.1434	94.1934
146.15	479.495	2.91	2.74	298.8	94.1422	94.1922
146.14	479.462	2.92	2.75	300	94.141	94.191
146.13	479.429	2.93	2.76	301.2	94.1398	94.1898
146.12	479.396	2.94	2.77	302.4	94.1386	94.1886
146.11	479.364	2.95	2.78	303.6	94.1374	94.1874
146.1	479.331	2.96	2.79	304.8	94.1362	94.1862
146.09	479.298	2.97	2.8	306	94.135	94.185
146.08	479.265	2.98	2.81	307.2	94.1338	94.1838
146.07	479.232	2.99	2.82	308.4	94.1326	94.1826
146.06	479.199	3	2.83	309.6	94.1314	94.1814
146.05	479.167	3.01	2.84	310.8	94.1302	94.1802
146.04	479.134	3.02	2.85	312	94.129	94.179
146.03	479.101	3.03	2.86	313.2	94.1278	94.1778
146.02	479.068	3.04	2.87	314.4	94.1266	94.1766
146.01	479.035	3.05	2.88	315.6	94.1254	94.1754
146	479.003	3.06	2.89	316.8	94.1242	94.1742
145.99	478.97	3.07	2.9	318	94.123	94.173
145.98	478.937	3.08	2.91	319.2	94.1218	94.1718
145.97	478.904	3.09	2.92	320.4	94.1206	94.1706
145.96	478.871	3.1	2.93	321.6	94.1194	94.1694
145.95	478.839	3.11	2.94	322.8	94.1182	94.1682
145.94	478.806	3.12	2.95	324	94.117	94.167
145.93	478.773	3.13	2.96	325.2	94.1158	94.1658
145.92	478.74	3.14	2.97	326.4	94.1146	94.1646
145.91	478.707	3.15	2.98	327.6	94.1134	94.1634
145.9	478.675	3.16	2.99	328.8	94.1122	94.1622
145.89	478.642	3.17	3	330	94.111	94.161
145.88	478.609	3.18	3.01	331.2	94.1098	94.1598
145.87	478.576	3.19	3.02	332.4	94.1086	94.1586
145.86	478.543	3.2	3.03	333.6	94.1074	94.1574
145.85	478.51	3.21	3.04	334.8	94.1062	94.1562
145.84	478.478	3.22	3.05	336	94.105	94.155
145.83	478.445	3.23	3.06	337.2	94.1038	94.1538
145.82	478.412	3.24	3.07	338.4	94.1026	94.1526
145.81	478.379	3.25	3.08	339.6	94.1014	94.1514
145.8	478.346	3.26	3.09	340.8	94.1002	94.1502
145.79	478.314	3.27	3.1	342	94.099	94.149
145.78	478.281	3.28	3.11	343.2	94.0978	94.1478
145.77	478.248	3.29	3.12	344.4	94.0966	94.1466
145.76	478.215	3.3	3.13	345.6	94.0954	94.1454
145.75	478.182	3.31	3.14	346.8	94.0942	94.1442
145.74	478.15	3.32	3.15	348	94.093	94.143
145.73	478.117	3.33	3.16	349.2	94.0918	94.1418
145.72	478.084	3.34	3.17	350.4	94.0906	94.1406
145.71	478.051	3.35	3.18	351.6	94.0894	94.1394
145.7	478.018	3.36	3.19	352.8	94.0882	94.1382
145.69	477.986	3.37	3.2	354	94.087	94.137
145.68	477.953	3.38	3.21	355.2	94.0858	94.1358
145.67	477.92	3.39	3.22	356.4	94.0846	94.1346
145.66	477.887	3.4	3.23	357.6	94.0834	94.1334
145.65	477.854	3.41	3.24	358.8	94.0822	94.1322
145.64	477.822	3.42	3.25	360	94.081	94.131
145.63	477.789	3.43	3.26	361.2	94.0798	94.1298
145.62	477.756	3.44	3.27	362.4	94.0786	94.1286
145.61	477.723	3.45	3.28	363.6	94.0774	94.1274
145.6	477.69	3.46	3.29	364.8	94.0762	94.1262
145.59	477.657	3.47	3.3	366	94.075	94.125
145.58	477.625	3.48	3.31	367.15	94.0739	94.1239
145.57	477.592	3.49	3.32	368.3	94.0727	94.1227
145.56	477.559	3.5	3.33	369.45	94.0716	94.1215
145.55	477.526	3.51	3.34	370.6	94.0704	94.1204
145.54	477.493	3.52	3.35	371.75	94.0693	94.1193
145.53	477.461	3.53	3.36	372.9	94.0681	94.1181
145.52	477.428	3.54	3.36	372.9	94.0681	94.1181	bentonite B
145.51	477.395	3.55	3.36	372.9	94.0681	94.1181	bentonite B
145.5	477.362	3.56	3.36	372.9	94.0681	94.1181	bentonite B
145.49	477.329	3.57	3.36	372.9	94.0681	94.1181	bentonite B
145.48	477.297	3.58	3.36	372.9	94.0681	94.1181	bentonite B
145.47	477.264	3.59	3.36	372.9	94.0681	94.1181	bentonite B
145.46	477.231	3.6	3.36	372.9	94.0681	94.1181	bentonite B
145.45	477.198	3.61	3.36	372.9	94.0681	94.1181	bentonite B
145.44	477.165	3.62	3.36	372.9	94.0681	94.1181	bentonite B
145.43	477.133	3.63	3.36	372.9	94.0681	94.1181	bentonite B
145.42	477.1	3.64	3.36	372.9	94.0681	94.1181	bentonite B
145.41	477.067	3.65	3.36	372.9	94.0681	94.1181	bentonite B
145.4	477.034	3.66	3.36	372.9	94.0681	94.1181	bentonite B
145.39	477.001	3.67	3.36	372.9	94.0681	94.1181	bentonite B
145.38	476.969	3.68	3.37	374.05	94.067	94.117
145.37	476.936	3.69	3.38	375.2	94.0658	94.1158
145.36	476.903	3.7	3.39	376.35	94.0647	94.1146
145.35	476.87	3.71	3.4	377.5	94.0635	94.1135
145.34	476.837	3.72	3.41	378.65	94.0624	94.1124
145.33	476.804	3.73	3.42	379.8	94.0612	94.1112
145.32	476.772	3.74	3.43	380.95	94.0601	94.1101
145.31	476.739	3.75	3.44	382.1	94.0589	94.1089
145.3	476.706	3.76	3.45	383.25	94.0577	94.1077
145.29	476.673	3.77	3.46	384.4	94.0566	94.1066
145.28	476.64	3.78	3.47	385.55	94.0555	94.1055
145.27	476.608	3.79	3.48	386.7	94.0543	94.1043
145.26	476.575	3.8	3.49	387.85	94.0532	94.1031
145.25	476.542	3.81	3.5	389	94.052	94.102
145.24	476.509	3.82	3.51	390.2	94.0508	94.1008
145.23	476.476	3.83	3.52	391.4	94.0496	94.0996
145.22	476.444	3.84	3.53	392.6	94.0484	94.0984
145.21	476.411	3.85	3.54	393.8	94.0472	94.0972
145.2	476.378	3.86	3.55	395	94.046	94.096
145.19	476.345	3.87	3.56	396.2	94.0448	94.0948
145.18	476.312	3.88	3.57	397.4	94.0436	94.0936
145.17	476.28	3.89	3.58	398.6	94.0424	94.0924
145.16	476.247	3.9	3.59	399.8	94.0412	94.0912
145.15	476.214	3.91	3.6	401	94.04	94.09
145.14	476.181	3.92	3.61	402.2	94.0388	94.0888
145.13	476.148	3.93	3.62	403.4	94.0376	94.0876
145.12	476.115	3.94	3.63	404.6	94.0364	94.0864
145.11	476.083	3.95	3.64	405.8	94.0352	94.0852
145.1	476.05	3.96	3.65	407	94.034	94.084
145.09	476.017	3.97	3.66	408.2	94.0328	94.0828
145.08	475.984	3.98	3.67	409.4	94.0316	94.0816
145.07	475.951	3.99	3.68	410.6	94.0304	94.0804
145.06	475.919	4	3.69	411.8	94.0292	94.0792
145.05	475.886	4.01	3.7	413	94.028	94.078
145.04	475.853	4.02	3.71	414.2	94.0268	94.0768
145.03	475.82	4.03	3.72	415.4	94.0256	94.0756
145.02	475.787	4.04	3.73	416.6	94.0244	94.0744
145.01	475.755	4.05	3.74	417.8	94.0232	94.0732
145	475.722	4.06	3.75	419	94.022	94.072
144.99	475.689	4.07	3.76	420.2	94.0208	94.0708
144.98	475.656	4.08	3.77	421.4	94.0196	94.0696
144.97	475.623	4.09	3.78	422.6	94.0184	94.0684
144.96	475.591	4.1	3.79	423.8	94.0172	94.0672
144.95	475.558	4.11	3.8	425	94.016	94.066
144.94	475.525	4.12	3.81	426.2	94.0148	94.0648
144.93	475.492	4.13	3.82	427.4	94.0136	94.0636
144.92	475.459	4.14	3.83	428.6	94.0124	94.0624
144.91	475.427	4.15	3.84	429.8	94.0112	94.0612
144.9	475.394	4.16	3.85	431	94.01	94.06
144.89	475.361	4.17	3.86	432.2	94.0088	94.0588
144.88	475.328	4.18	3.87	433.4	94.0076	94.0576
144.87	475.295	4.19	3.88	434.6	94.0064	94.0564
144.86	475.262	4.2	3.89	435.8	94.0052	94.0552
144.85	475.23	4.21	3.9	437	94.004	94.054
144.84	475.197	4.22	3.91	438.15	94.0029	94.0529
144.83	475.164	4.23	3.92	439.3	94.0017	94.0517
144.82	475.131	4.24	3.93	440.45	94.0006	94.0506
144.81	475.098	4.25	3.94	441.6	93.9994	94.0494
144.8	475.066	4.26	3.95	442.75	93.9982	94.0482
144.79	475.033	4.27	3.96	443.9	93.9971	94.0471
144.78	475	4.28	3.97	445.05	93.996	94.046
144.77	474.967	4.29	3.98	446.2	93.9948	94.0448
144.76	474.934	4.3	3.99	447.35	93.9937	94.0436
144.75	474.902	4.31	4	448.5	93.9925	94.0425
144.74	474.869	4.32	4.01	449.65	93.9914	94.0414
144.73	474.836	4.33	4.02	450.8	93.9902	94.0402
144.72	474.803	4.34	4.03	451.95	93.9891	94.0391
144.71	474.77	4.35	4.04	453.1	93.9879	94.0379
144.7	474.738	4.36	4.05	454.25	93.9868	94.0367
144.69	474.705	4.37	4.06	455.4	93.9856	94.0356
144.68	474.672	4.38	4.07	456.55	93.9845	94.0345
144.67	474.639	4.39	4.08	457.7	93.9833	94.0333
144.66	474.606	4.4	4.09	458.85	93.9822	94.0322
144.65	474.573	4.41	4.1	460	93.981	94.031
144.64	474.541	4.42	4.11	461.1	93.9799	94.0299
144.63	474.508	4.43	4.12	462.2	93.9788	94.0288
144.62	474.475	4.44	4.13	463.3	93.9777	94.0277
144.61	474.442	4.45	4.14	464.4	93.9766	94.0266
144.6	474.409	4.46	4.15	465.5	93.9755	94.0255
144.59	474.377	4.47	4.16	466.6	93.9744	94.0244
144.58	474.344	4.48	4.17	467.7	93.9733	94.0233
144.57	474.311	4.49	4.18	468.8	93.9722	94.0222
144.56	474.278	4.5	4.19	469.9	93.9711	94.0211
144.55	474.245	4.51	4.2	471	93.97	94.02
144.54	474.213	4.52	4.21	472.1	93.9689	94.0189
144.53	474.18	4.53	4.22	473.2	93.9678	94.0178
144.52	474.147	4.54	4.23	474.3	93.9667	94.0167
144.51	474.114	4.55	4.24	475.4	93.9656	94.0156
144.5	474.081	4.56	4.25	476.5	93.9645	94.0145
144.49	474.049	4.57	4.26	477.6	93.9634	94.0134
144.48	474.016	4.58	4.27	478.7	93.9623	94.0123
144.47	473.983	4.59	4.28	479.8	93.9612	94.0112
144.46	473.95	4.6	4.29	480.9	93.9601	94.0101
144.45	473.917	4.61	4.3	482	93.959	94.009
144.44	473.885	4.62	4.31	483	93.958	94.008
144.43	473.852	4.63	4.32	484	93.957	94.007
144.42	473.819	4.64	4.33	485	93.956	94.006
144.41	473.786	4.65	4.34	486	93.955	94.005
144.4	473.753	4.66	4.35	487	93.954	94.004
144.39	473.72	4.67	4.36	488	93.953	94.003
144.38	473.688	4.68	4.37	489	93.952	94.002
144.37	473.655	4.69	4.38	490	93.951	94.001
144.36	473.622	4.7	4.39	491	93.95	94
144.35	473.589	4.71	4.4	492	93.949	93.999
144.34	473.556	4.72	4.41	493	93.948	93.998
144.33	473.524	4.73	4.42	494	93.947	93.997
144.32	473.491	4.74	4.43	495	93.946	93.996
144.31	473.458	4.75	4.44	496	93.945	93.995
144.3	473.425	4.76	4.45	497	93.944	93.994
144.29	473.392	4.77	4.46	498	93.943	93.993
144.28	473.36	4.78	4.47	499	93.942	93.992
144.27	473.327	4.79	4.48	500	93.941	93.991
144.26	473.294	4.8	4.49	501	93.94	93.99
144.25	473.261	4.81	4.5	502	93.939	93.989
144.24	473.228	4.82	4.51	503.05	93.938	93.9879
144.23	473.196	4.83	4.52	504.1	93.9369	93.9869
144.22	473.163	4.84	4.53	505.15	93.9359	93.9858
144.21	473.13	4.85	4.54	506.2	93.9348	93.9848
144.2	473.097	4.86	4.55	507.25	93.9338	93.9838
144.19	473.064	4.87	4.56	508.3	93.9327	93.9827
144.18	473.031	4.88	4.57	509.35	93.9317	93.9817
144.17	472.999	4.89	4.58	510.4	93.9306	93.9806
144.16	472.966	4.9	4.59	511.45	93.9296	93.9796
144.15	472.933	4.91	4.6	512.5	93.9285	93.9785
144.14	472.9	4.92	4.61	513.55	93.9275	93.9775
144.13	472.867	4.93	4.62	514.6	93.9264	93.9764
144.12	472.835	4.94	4.63	515.65	93.9254	93.9754
144.11	472.802	4.95	4.64	516.7	93.9243	93.9743
144.1	472.769	4.96	4.65	517.75	93.9233	93.9733
144.09	472.736	4.97	4.66	518.8	93.9222	93.9722
144.08	472.703	4.98	4.67	519.85	93.9212	93.9712
144.07	472.671	4.99	4.68	520.9	93.9201	93.9701
144.06	472.638	5	4.69	521.95	93.919	93.969
144.05	472.605	5.01	4.7	523	93.918	93.968
144.04	472.572	5.02	4.71	524	93.917	93.967
144.03	472.539	5.03	4.72	525	93.916	93.966
144.02	472.507	5.04	4.73	526	93.915	93.965
144.01	472.474	5.05	4.74	527	93.914	93.964
144	472.441	5.06	4.75	528	93.913	93.963
143.99	472.408	5.07	4.76	529	93.912	93.962
143.98	472.375	5.08	4.77	530	93.911	93.961
143.97	472.343	5.09	4.78	531	93.91	93.96
143.96	472.31	5.1	4.79	532	93.909	93.959
143.95	472.277	5.11	4.8	533	93.908	93.958
143.94	472.244	5.12	4.81	534	93.907	93.957
143.93	472.211	5.13	4.82	535	93.906	93.956
143.92	472.178	5.14	4.83	536	93.905	93.955
143.91	472.146	5.15	4.84	537	93.904	93.954
143.9	472.113	5.16	4.85	538	93.903	93.953
143.89	472.08	5.17	4.86	539	93.902	93.952
143.88	472.047	5.18	4.87	540	93.901	93.951
143.87	472.014	5.19	4.88	541	93.9	93.95	Cenomanian-Turonian Boundary (base of Bed 86)
143.86	471.982	5.2	4.89	542	93.899	93.949
143.85	471.949	5.21	4.9	543	93.898	93.948
143.84	471.916	5.22	4.91	543.95	93.8971	93.9471
143.83	471.883	5.23	4.92	544.9	93.8961	93.9461
143.82	471.85	5.24	4.93	545.85	93.8952	93.9451
143.81	471.818	5.25	4.94	546.8	93.8942	93.9442
143.8	471.785	5.26	4.95	547.75	93.8933	93.9433
143.79	471.752	5.27	4.96	548.7	93.8923	93.9423
143.78	471.719	5.28	4.97	549.65	93.8914	93.9413
143.77	471.686	5.29	4.98	550.6	93.8904	93.9404
143.76	471.654	5.3	4.99	551.55	93.8895	93.9395
143.75	471.621	5.31	5	552.5	93.8885	93.9385
143.74	471.588	5.32	5.01	553.45	93.8876	93.9376
143.73	471.555	5.33	5.02	554.4	93.8866	93.9366
143.72	471.522	5.34	5.03	555.35	93.8857	93.9357
143.71	471.49	5.35	5.04	556.3	93.8847	93.9347
143.7	471.457	5.36	5.05	557.25	93.8838	93.9338
143.69	471.424	5.37	5.06	558.2	93.8828	93.9328
143.68	471.391	5.38	5.07	559.15	93.8819	93.9318
143.67	471.358	5.39	5.08	560.1	93.8809	93.9309
143.66	471.325	5.4	5.09	561.05	93.88	93.93
143.65	471.293	5.41	5.1	562	93.879	93.929
143.64	471.26	5.42	5.11	563	93.878	93.928
143.63	471.227	5.43	5.12	564	93.877	93.927
143.62	471.194	5.44	5.13	565	93.876	93.926
143.61	471.161	5.45	5.14	566	93.875	93.925
143.6	471.129	5.46	5.15	567	93.874	93.924
143.59	471.096	5.47	5.16	568	93.873	93.923
143.58	471.063	5.48	5.17	569	93.872	93.922
143.57	471.03	5.49	5.18	570	93.871	93.921
143.56	470.997	5.5	5.19	571	93.87	93.92
143.55	470.965	5.51	5.2	572	93.869	93.919
143.54	470.932	5.52	5.21	573	93.868	93.918
143.53	470.899	5.53	5.22	574	93.867	93.917
143.52	470.866	5.54	5.23	575	93.866	93.916
143.51	470.833	5.55	5.24	576	93.865	93.915
143.5	470.801	5.56	5.25	577	93.864	93.914
143.49	470.768	5.57	5.26	578	93.863	93.913
143.48	470.735	5.58	5.27	579	93.862	93.912
143.47	470.702	5.59	5.28	580	93.861	93.911
143.46	470.669	5.6	5.29	581	93.86	93.91
143.45	470.636	5.61	5.3	582	93.859	93.909
143.44	470.604	5.62	5.31	582.95	93.8581	93.9081
143.43	470.571	5.63	5.32	583.9	93.8571	93.9071
143.42	470.538	5.64	5.33	584.85	93.8561	93.9061
143.41	470.505	5.65	5.34	585.8	93.8552	93.9052
143.4	470.472	5.66	5.35	586.75	93.8543	93.9043
143.39	470.44	5.67	5.36	587.7	93.8533	93.9033
143.38	470.407	5.68	5.37	588.65	93.8524	93.9023
143.37	470.374	5.69	5.38	589.6	93.8514	93.9014
143.36	470.341	5.7	5.39	590.55	93.8505	93.9005
143.35	470.308	5.71	5.4	591.5	93.8495	93.8995
143.34	470.276	5.72	5.41	592.45	93.8486	93.8986
143.33	470.243	5.73	5.42	593.4	93.8476	93.8976
143.32	470.21	5.74	5.43	594.35	93.8467	93.8967
143.31	470.177	5.75	5.44	595.3	93.8457	93.8957
143.3	470.144	5.76	5.45	596.25	93.8448	93.8948
143.29	470.112	5.77	5.46	597.2	93.8438	93.8938
143.28	470.079	5.78	5.47	598.15	93.8429	93.8929
143.27	470.046	5.79	5.48	599.1	93.8419	93.8919
143.26	470.013	5.8	5.49	600.05	93.841	93.891
143.25	469.98	5.81	5.5	601	93.84	93.89
143.24	469.948	5.82	5.51	602.1	93.8389	93.8889
143.23	469.915	5.83	5.52	603.2	93.8378	93.8878
143.22	469.882	5.84	5.53	604.3	93.8367	93.8867
143.21	469.849	5.85	5.54	605.4	93.8356	93.8856
143.2	469.816	5.86	5.55	606.5	93.8345	93.8845
143.19	469.783	5.87	5.56	607.6	93.8334	93.8834
143.18	469.751	5.88	5.57	608.7	93.8323	93.8823
143.17	469.718	5.89	5.58	609.8	93.8312	93.8812
143.16	469.685	5.9	5.59	610.9	93.8301	93.8801
143.15	469.652	5.91	5.6	612	93.829	93.879
143.14	469.619	5.92	5.61	613.1	93.8279	93.8779
143.13	469.587	5.93	5.62	614.2	93.8268	93.8768
143.12	469.554	5.94	5.63	615.3	93.8257	93.8757
143.11	469.521	5.95	5.64	616.4	93.8246	93.8746
143.1	469.488	5.96	5.65	617.5	93.8235	93.8735
[truncated: 574 more rows]

## Sheet: SH#1Core
Table DR6b. SH#1 CORE TIME SCALE
			Anchor 1: NC-B date	94.082	+/- 0.057, +/- 0.15
			Anchor 2: Cumulative weighted mean CTB age	93.95	+/-0.05 Ma
Depth (m)	ATS ka (original)	ka (0 ka = base of CIE)	Age Ma (NC-B Anchor 1)	Age Ma (CTB Age Anchor 2)	notes
94.01	877.408	862.484	93.5607	93.6103
94.11	874.825	859.902	93.5633	93.6128
94.21	872.242	857.319	93.5659	93.6154
94.31	869.66	854.737	93.5685	93.618
94.41	867.077	852.154	93.5711	93.6206
94.51	864.494	849.571	93.5737	93.6232
94.61	861.912	846.989	93.5762	93.6258
94.71	859.329	844.406	93.5788	93.6283
94.81	856.747	841.823	93.5814	93.6309
94.91	854.164	839.241	93.584	93.6335
95.01	851.581	836.658	93.5866	93.6361
95.11	848.999	834.076	93.5892	93.6387
95.21	846.416	831.493	93.5917	93.6412
95.31	843.833	828.91	93.5943	93.6438
95.41	841.251	826.328	93.5969	93.6464
95.51	838.668	823.745	93.5995	93.649
95.61	836.086	821.162	93.6021	93.6516
95.71	833.503	818.58	93.6047	93.6542
95.81	830.92	815.997	93.6072	93.6567
95.91	828.338	813.415	93.6098	93.6593
96.01	825.755	810.832	93.6124	93.6619
96.11	823.172	808.249	93.615	93.6645
96.21	820.59	805.667	93.6176	93.6671
96.31	818.007	803.084	93.6201	93.6697
96.41	815.425	800.501	93.6227	93.6722
96.51	812.842	797.919	93.6253	93.6748
96.61	810.259	795.336	93.6279	93.6774
96.71	807.677	792.754	93.6305	93.68
96.81	805.094	790.171	93.6331	93.6826
96.91	802.511	787.588	93.6356	93.6852	*Constant sed rate of 3.9cm/kyr extrapolated to 94m
97.01	799.941	785.018	93.6382	93.6877	Top of ATS
97.11	797.322	782.399	93.6408	93.6903
97.21	794.776	779.853	93.6434	93.6929
97.31	792.302	777.379	93.6459	93.6954
97.41	789.889	774.966	93.6483	93.6978
97.51	787.525	772.602	93.6506	93.7001
97.61	785.185	770.262	93.653	93.7025
97.71	782.857	767.934	93.6553	93.7048
97.81	780.541	765.618	93.6576	93.7071
97.91	778.237	763.314	93.6599	93.7094
98.01	775.921	760.998	93.6622	93.7117
98.11	773.581	758.658	93.6646	93.7141
98.21	771.217	756.294	93.6669	93.7164
98.31	768.816	753.893	93.6693	93.7188
98.41	766.355	751.432	93.6718	93.7213
98.51	763.833	748.91	93.6743	93.7238
98.61	761.25	746.327	93.6769	93.7264
98.71	758.607	743.684	93.6795	93.7291
98.81	755.939	741.016	93.6822	93.7317
98.91	753.296	738.373	93.6849	93.7344
99.01	750.689	735.766	93.6875	93.737
99.11	748.119	733.196	93.69	93.7395
99.21	745.621	730.698	93.6925	93.742
99.31	743.22	728.297	93.6949	93.7444
99.41	740.892	725.969	93.6973	93.7468
99.51	738.601	723.677	93.6996	93.7491
99.61	736.333	721.41	93.7018	93.7513
99.71	734.078	719.155	93.7041	93.7536
99.81	731.811	716.887	93.7063	93.7559
99.91	729.531	714.608	93.7086	93.7581	bentonite C (new)
100.01	727.239	712.316	93.7109	93.7604
100.11	724.911	709.988	93.7132	93.7628
100.21	722.547	707.624	93.7156	93.7651
100.31	720.171	705.247	93.718	93.7675
100.41	717.794	702.871	93.7204	93.7699
100.51	715.418	700.494	93.7227	93.7722
100.61	713.053	698.13	93.7251	93.7746
100.71	710.725	695.802	93.7274	93.7769
100.81	708.434	693.51	93.7297	93.7792
100.91	706.154	691.231	93.732	93.7815
101.01	703.875	688.951	93.7343	93.7838
101.11	701.583	686.66	93.7366	93.7861
101.21	699.243	684.32	93.7389	93.7884
101.31	696.83	681.907	93.7413	93.7908
101.41	694.344	679.421	93.7438	93.7933
101.51	691.774	676.851	93.7464	93.7959
101.61	689.118	674.195	93.749	93.7985
101.71	686.39	671.467	93.7518	93.8013
101.81	683.577	668.654	93.7546	93.8041
101.91	680.679	665.756	93.7575	93.807
102.01	677.745	662.822	93.7604	93.8099
102.11	674.811	659.888	93.7633	93.8129
102.21	671.877	656.954	93.7663	93.8158
102.31	668.93	654.007	93.7692	93.8187
102.41	665.978	651.055	93.7722	93.8217
102.51	663.038	648.114	93.7751	93.8246
102.61	660.128	645.204	93.778	93.8275
102.71	657.266	642.343	93.7809	93.8304
102.81	654.465	639.542	93.7837	93.8332
102.91	651.725	636.802	93.7864	93.8359
103.01	649.033	634.11	93.7891	93.8386
103.11	646.366	631.443	93.7918	93.8413
103.21	643.698	628.775	93.7945	93.844
103.31	641.006	626.083	93.7971	93.8467
103.41	638.278	623.355	93.7999	93.8494
103.51	635.532	620.609	93.8026	93.8521
103.61	632.774	617.851	93.8054	93.8549
103.71	629.985	615.062	93.8082	93.8577
103.81	627.148	612.225	93.811	93.8605
103.91	624.262	609.339	93.8139	93.8634
104.01	621.315	606.392	93.8168	93.8663
104.11	618.296	603.373	93.8199	93.8694
104.21	615.192	600.269	93.823	93.8725
104.31	611.991	597.068	93.8262	93.8757
104.41	608.718	593.795	93.8294	93.8789
104.51	605.395	590.472	93.8328	93.8823
104.61	602.037	587.114	93.8361	93.8856
104.71	598.672	583.749	93.8395	93.889
104.81	595.32	580.396	93.8428	93.8923
104.91	591.997	577.074	93.8462	93.8957
105.01	588.748	573.825	93.8494	93.8989
105.11	585.62	570.696	93.8525	93.902
105.19	583.2	568.277	93.855	93.9045
105.21	582.613	567.689	93.8555	93.9051
105.31	579.606	564.682	93.8586	93.9081
105.41	576.429	561.506	93.8617	93.9112
105.51	572.997	558.074	93.8652	93.9147
105.61	569.336	554.413	93.8688	93.9183
105.71	565.492	550.569	93.8727	93.9222
105.81	561.491	546.568	93.8767	93.9262
105.91	557.368	542.445	93.8808	93.9303
106.01	553.197	538.274	93.885	93.9345
106.11	549.087	534.164	93.8891	93.9386
106.21	545.122	530.199	93.893	93.9425
106.31	541.327	526.404	93.8968	93.9463
106.41	537.665	522.742	93.9005	93.95	CTB (new this study)	stratigraphic uncertainty (-/+ ka):	-71.0525	73.8534
106.51	534.088	519.165	93.9041	93.9536
106.61	530.572	515.649	93.9076	93.9571
106.71	527.104	512.181	93.9111	93.9606
106.81	523.661	508.738	93.9145	93.964
106.91	520.205	505.282	93.918	93.9675
107.01	516.725	501.802	93.9214	93.9709
107.11	513.221	498.298	93.9249	93.9744
107.21	509.693	494.77	93.9285	93.978
107.31	506.152	491.229	93.932	93.9815
107.41	502.624	487.701	93.9355	93.985
107.51	499.108	484.185	93.939	93.9886
107.61	495.579	480.656	93.9426	93.9921
107.71	492.027	477.104	93.9461	93.9956
107.81	488.426	473.502	93.9497	93.9992
107.91	484.74	469.816	93.9534	94.0029
108.01	480.92	465.997	93.9572	94.0067
108.11	476.931	462.008	93.9612	94.0107
108.21	472.748	457.825	93.9654	94.0149	CTB (old Jones et al., 2019)
108.31	468.359	453.436	93.9698	94.0193
108.41	463.812	448.889	93.9743	94.0239
108.51	459.192	444.269	93.979	94.0285
108.61	454.573	439.649	93.9836	94.0331
108.71	450.001	435.078	93.9882	94.0377
108.81	446.166	431.243	93.992	94.0415
108.91	443.399	428.476	93.9948	94.0443
109.01	441.23	426.307	93.9969	94.0464
109.11	439.218	424.295	93.9989	94.0484
109.21	437.12	422.197	94.001	94.0505
109.31	434.998	420.075	94.0032	94.0527
109.41	432.852	417.929	94.0053	94.0548
109.51	430.682	415.759	94.0075	94.057
109.61	428.487	413.564	94.0097	94.0592
109.71	426.268	411.345	94.0119	94.0614
109.81	424.025	409.102	94.0141	94.0636
109.91	421.746	406.822	94.0164	94.0659
110.01	419.43	404.507	94.0187	94.0682
110.11	417.09	402.166	94.0211	94.0706
110.21	414.713	399.79	94.0234	94.073
110.31	412.288	397.365	94.0259	94.0754
110.41	409.802	394.879	94.0284	94.0779
110.51	407.268	392.345	94.0309	94.0804
110.61	404.71	389.787	94.0334	94.083
110.71	402.139	387.216	94.036	94.0855
110.81	399.557	384.634	94.0386	94.0881
110.91	396.95	382.027	94.0412	94.0907
111.01	394.307	379.384	94.0438	94.0934
111.11	391.616	376.693	94.0465	94.096
111.21	388.888	373.965	94.0493	94.0988
111.31	386.135	371.212	94.052	94.1015
111.41	383.359	368.436	94.0548	94.1043
111.51	380.582	365.659	94.0576	94.1071
111.61	377.83	362.907	94.0603	94.1098
111.71	375.077	360.154	94.0631	94.1126
111.81	372.301	357.378	94.0659	94.1154
111.91	369.488	354.565	94.0687	94.1182
112.01	366.614	351.691	94.0715	94.1211
112.11	363.68	348.757	94.0745	94.124
112.21	360.709	345.786	94.0774	94.127
112.31	357.702	342.779	94.0805	94.13
112.35	356.156	341.233	94.082	94.1315	Bentonite B
112.41	354.61	339.687	94.0835	94.1331
112.51	351.385	336.462	94.0868	94.1363
112.61	348.014	333.091	94.0901	94.1397
112.71	344.534	329.611	94.0936	94.1431
112.81	340.994	326.071	94.0972	94.1467
112.91	337.405	322.482	94.1008	94.1503
113.01	333.767	318.844	94.1044	94.1539
113.11	330.094	315.17	94.1081	94.1576
113.21	326.42	311.497	94.1117	94.1612
113.31	322.77	307.847	94.1154	94.1649
113.41	319.145	304.222	94.119	94.1685
113.51	315.556	300.633	94.1226	94.1721
113.61	311.991	297.068	94.1262	94.1757
113.71	308.414	293.491	94.1297	94.1793
113.81	304.795	289.872	94.1334	94.1829
113.91	301.116	286.193	94.137	94.1865
114.01	297.345	282.422	94.1408	94.1903
114.11	293.453	278.53	94.1447	94.1942
114.21	289.476	274.553	94.1487	94.1982
114.31	285.45	270.527	94.1527	94.2022
114.41	281.388	266.465	94.1568	94.2063
114.51	277.302	262.379	94.1609	94.2104
114.61	273.192	258.269	94.165	94.2145
114.71	269.069	254.146	94.1691	94.2186
114.81	264.935	250.012	94.1732	94.2227
114.91	260.764	245.841	94.1774	94.2269
115.01	256.544	241.621	94.1816	94.2311
115.11	252.282	237.359	94.1859	94.2354
115.21	247.984	233.061	94.1902	94.2397
115.31	243.644	228.721	94.1945	94.244
115.41	239.218	224.295	94.1989	94.2484
115.51	234.574	219.651	94.2036	94.2531
115.61	229.688	214.765	94.2085	94.258
115.71	224.668	209.745	94.2135	94.263
115.81	219.575	204.652	94.2186	94.2681
115.91	214.398	199.475	94.2238	94.2733
116.01	209.136	194.213	94.229	94.2785
116.11	203.886	188.963	94.2343	94.2838
116.21	198.696	183.773	94.2395	94.289
116.31	193.543	178.62	94.2446	94.2941
116.41	188.463	173.54	94.2497	94.2992
116.51	183.516	168.593	94.2546	94.3041
116.61	178.738	163.815	94.2594	94.3089
116.71	174.167	159.244	94.264	94.3135
116.81	169.86	154.937	94.2683	94.3178
116.91	165.843	150.92	94.2723	94.3218
117.01	162.079	147.156	94.2761	94.3256
117.11	158.538	143.615	94.2796	94.3291
117.21	155.195	140.272	94.283	94.3325
117.31	151.982	137.059	94.2862	94.3357
117.41	148.769	133.846	94.2894	94.3389
117.51	145.483	130.56	94.2927	94.3422
117.61	142.124	127.201	94.296	94.3455
117.71	138.693	123.77	94.2995	94.349
117.81	135.225	120.302	94.3029	94.3524
117.91	131.757	116.834	94.3064	94.3559
118.01	128.302	113.379	94.3099	94.3594
118.11	124.87	109.947	94.3133	94.3628
118.21	121.463	106.54	94.3167	94.3662
118.31	118.08	103.157	94.3201	94.3696
118.41	114.722	99.7991	94.3234	94.3729
118.51	111.388	96.4649	94.3268	94.3763
118.61	108.078	93.1548	94.3301	94.3796
118.71	104.768	89.8446	94.3334	94.3829
118.81	101.409	86.486	94.3367	94.3863
118.91	97	82.0769	94.3412	94.3907
119.01	93.2692	78.3462	94.3449	94.3944
119.11	89.5385	74.6154	94.3486	94.3981
119.21	85.8077	70.8846	94.3523	94.4019
119.31	82.0769	67.1538	94.3561	94.4056
119.41	78.3462	63.4231	94.3598	94.4093
119.51	74.6154	59.6923	94.3635	94.413
119.61	70.8846	55.9615	94.3673	94.4168
119.71	67.1538	52.2308	94.371	94.4205
119.81	63.4231	48.5	94.3747	94.4242
119.91	59.6923	44.7692	94.3785	94.428
120.01	55.9615	41.0385	94.3822	94.4317
120.11	52.2308	37.3077	94.3859	94.4354
120.21	48.5	33.5769	94.3897	94.4392
120.31	44.7692	29.8462	94.3934	94.4429
120.41	41.0385	26.1154	94.3971	94.4466
120.51	37.3077	22.3846	94.4008	94.4504
120.61	33.5769	18.6538	94.4046	94.4541
120.71	29.8462	14.9231	94.4083	94.4578
120.81	26.1154	11.1923	94.412	94.4615
120.91	22.3846	7.46154	94.4158	94.4653
121.01	18.6538	3.73077	94.4195	94.469
121.11	14.9231	0	94.4232	94.4727	Base of OAE2 CIE/truncated base of ATS (Jones et al., 2019)
121.21	10.385	-4.53808	94.4278	94.4773	*sed rate in deepest interval constrained by 59 kyr duration between d13C and Osi excursion from Angus Core
121.31	5.84692	-9.07615	94.4323	94.4818
121.41	1.30885	-13.6142	94.4368	94.4864
121.51	-3.22923	-18.1523	94.4414	94.4909
121.61	-7.76731	-22.6904	94.4459	94.4954
121.71	-12.3054	-27.2285	94.4505	94.5
121.81	-16.8435	-31.7665	94.455	94.5045
121.91	-21.3815	-36.3046	94.4595	94.509
122.01	-25.9196	-40.8427	94.4641	94.5136
122.11	-30.4577	-45.3808	94.4686	94.5181
122.21	-34.9958	-49.9188	94.4732	94.5227
122.31	-39.5338	-54.4569	94.4777	94.5272
122.41	-44.0719	-58.995	94.4822	94.5317	*base of osmium isotope excursion at 122.53m
122.51	-48.61	-63.5331	94.4868	94.5363
122.61	-53.1481	-68.0712	94.4913	94.5408
122.71	-57.6862	-72.6092	94.4958	94.5454
122.81	-62.2242	-77.1473	94.5004	94.5499
122.91	-66.7623	-81.6854	94.5049	94.5544
123.01	-71.3004	-86.2235	94.5095	94.559
123.11	-75.8385	-90.7615	94.514	94.5635
123.21	-80.3765	-95.2996	94.5185	94.568
123.31	-84.9146	-99.8377	94.5231	94.5726
123.41	-89.4527	-104.376	94.5276	94.5771
123.51	-93.9908	-108.914	94.5321	94.5817
123.61	-98.5288	-113.452	94.5367	94.5862
123.71	-103.067	-113.452	94.5367	94.5862
123.81	-107.605	-117.99	94.5412	94.5907
123.91	-112.143	-122.528	94.5458	94.5953
124.01	-116.681	-127.066	94.5503	94.5998
124.11	-121.219	-131.604	94.5548	94.6043
124.21	-125.757	-136.142	94.5594	94.6089
124.31	-130.295	-140.68	94.5639	94.6134
124.41	-134.833	-145.218	94.5685	94.618
124.51	-139.372	-149.757	94.573	94.6225
124.61	-143.91	-154.295	94.5775	94.627
124.71	-148.448	-158.833	94.5821	94.6316
124.81	-152.986	-163.371	94.5866	94.6361
124.91	-157.524	-167.909	94.5911	94.6407
125.01	-162.062	-172.447	94.5957	94.6452	base of Tropic Shale

## Sheet: AngusCore
Table DR6c. ANGUS CORE TIME SCALE					Carbon isotope chemostratigraphy
Depth (m) (Ma et al., 2014)	Time (kyr) 0kyr = base of CIE				Time (kyr)	Depth (Ma et al., 2014)	δ13Corg (Joo & Sageman, 2014)
2267.86	753.955				734.712	2268.03	-26.43
2268.04	733.58				700.472	2268.53	-26.01
2268.1	729.364				670.472	2269.02	-25.96
2268.33	713.205				616.268	2269.98	-25.75
2268.65	692.83				584.367	2270.52	-25.16
2268.86	679.864				552.838	2271.02	-24.88
2268.98	672.455				518.42	2271.48	-25.62
2269.39	652.08				483.166	2271.98	-25.1
2269.53	643.69				440.033	2272.48	-24.8
2269.73	631.705				406.307	2272.98	-24.25
2269.99	615.652				363.01	2273.48	-24.01
2270.06	611.33				330.835	2273.97	-23.8
2270.16	605.509				291.592	2274.48	-23.37
2270.41	590.955				258.144	2274.95	-24.06
2270.73	571.779				226.727	2275.45	-24.13
2270.75	570.58				199.724	2275.95	-23.71
2271.06	550.205				164.496	2276.45	-23.96
2271.24	537.107				131.337	2276.92	-24.48
2271.34	529.83				103.429	2277.45	-24.54
2271.52	515.16				71.3289	2277.98	-25.38
2271.59	509.455				38.724	2278.48	-24.84
2271.89	489.08				14.9853	2278.93	-25.48
2272.2	468.705				-14.8193	2279.42	-26.5
2272.21	467.506				-17.9086	2279.47	-26.23
2272.37	448.33				-24.3245	2279.57	-26.07
2272.4	446.066				-27.6116	2279.62	-26.73
2272.64	427.955				-30.8987	2279.67	-26.8
2272.82	416.494				-34.1858	2279.72	-26.39
2272.96	407.58				-37.4729	2279.77	-26.98
2273.28	387.205				-43.3743	2279.87	-26.56
2273.42	366.83				-45.9867	2279.92	-26.36
2273.69	349.639				-48.5978	2279.97	-26.66
2273.72	347.728				-51.2089	2280.02	-26.41
2273.74	346.455				-53.82	2280.07	-26.14
2274.04	326.08				-59.0486	2280.17	-26.46
2274.3	305.7				-61.6908	2280.22	-26.45
2274.36	300.997				-64.4449	2280.27	-26.78
2274.56	285.32				-67.1989	2280.32	-26.31
2274.84	264.94				-126.356	2281.4	-26.82
2274.98	256.294				-218.622	2282.89	-27.11
2275.17	244.56				-252.035	2283.38	-26.67
2275.46	226.091
2275.49	224.18
2275.59	219.085
2275.89	203.8
2276.18	184.099
2276.19	183.42
2276.47	163.04
2276.63	149.997
2276.72	142.66
2276.85	135.301
2277.08	122.28
2277.22	115.147
2277.48	101.9
2277.83	81.52
2277.86	79.482
2278.13	61.14
2278.18	57.8529
2278.44	40.76
2278.54	35.665
2278.84	20.38
2279.18	0
2279.37	-11.7339
2279.51	-20.38
2279.82	-40.76
2279.89	-44.4179
2280.07	-53.8241
2280.21	-61.14
2280.58	-81.52
2280.61	-82.9095
2281	-100.974
2281.02	-101.9
2281.15	-110.179
2281.34	-122.28
2281.64	-142.66
2281.8	-152.251
2281.98	-163.04
2282.24	-180.133
2282.29	-183.42
2282.44	-191.912
2282.65	-203.8
2282.98	-224.18
2283.1	-232.613
2283.27	-244.56
2283.48	-258.826
2283.57	-264.94
2283.6	-267.048
2283.86	-285.32
